# Supplementary material for: Data Mining for Identifying Novel Associations and Temporal Relationships with Charcot Foot
Source: J Diabetes Res. 2014 Apr 27;2014:214353. doi: 10.1155/2014/214353 (PMC4020407; doi:10.1155/2014/214353)
Supplement: Supplementary file 1 — The Supplementary Material contains a table in the Microsoft Excel format that lists all of the associations we found with Charcot foot. These include associations that were found but not discussed in the manuscript. Additional information about how to interpret the results in the supplementary table are also provided within the file. [file 214353.f1.xlsx]

## Sheet: Associations with Charcot Foot
Concept 1	Concept 1 Description	Concept 1 Category	Concept 2	Concept 2 Description	Concept 2 Category	# Pts with C1 and C2	# Pts with C1, NOT C2	# Pts with C2, NOT C1	# Pts without C1 or C2	Odds Ratio	Chi Square p value	Chi square statistics	# times C1 precedes C2	# times C2 precedes C1	Temporal Direction	Temporal P value
008.8	enteritis, viral nos	infectious and parasitic diseases	713.5	arthropathy w/neurological disorder	diseases of the musculoskeletal system and connective tissue	15	17389	373	1602503	3.70601	3.5954e-07	25.9001	10	5	----->	0.30176
038.9	septicemia nos	infectious and parasitic diseases	713.5	arthropathy w/neurological disorder	diseases of the musculoskeletal system and connective tissue	39	15100	349	1604792	11.8763	1.2014e-75	338.738	26	12	----->	0.033552
041.10	infection, staphylococcus nos	infectious and parasitic diseases	713.5	arthropathy w/neurological disorder	diseases of the musculoskeletal system and connective tissue	35	3247	353	1616645	49.3657	3.62920020897548e-317	1449.53	14	21	<-----	0.3105
041.11	infection, mssa staph aureus	infectious and parasitic diseases	713.5	arthropathy w/neurological disorder	diseases of the musculoskeletal system and connective tissue	23	2078	365	1617814	49.0589	1.781e-211	963.213	9	14	<-----	0.40487
041.4	infection, e. coli nos	infectious and parasitic diseases	713.5	arthropathy w/neurological disorder	diseases of the musculoskeletal system and connective tissue	10	1666	378	1618226	25.6964	7.8341e-47	206.534	5	4	----->	1
041.7	infection, pseudomonas	infectious and parasitic diseases	713.5	arthropathy w/neurological disorder	diseases of the musculoskeletal system and connective tissue	12	1374	376	1618518	37.5945	8.3228e-84	376.209	4	8	<-----	0.3877
041.89	infection, bacterial nec	infectious and parasitic diseases	713.5	arthropathy w/neurological disorder	diseases of the musculoskeletal system and connective tissue	11	748	377	1619144	63.159	1.692e-129	586.187	1	10	<-----	0.011719
053.9	herpes zoster, uncomplicated	infectious and parasitic diseases	713.5	arthropathy w/neurological disorder	diseases of the musculoskeletal system and connective tissue	15	7399	373	1612493	8.7641	1.0391e-21	91.6411	12	3	----->	0.035156
078.10	warts, viral nos	infectious and parasitic diseases	713.5	arthropathy w/neurological disorder	diseases of the musculoskeletal system and connective tissue	16	31660	372	1588232	2.15765	0.0037007	8.42513	12	4	----->	0.076813
079.99	infection, viral nos	infectious and parasitic diseases	713.5	arthropathy w/neurological disorder	diseases of the musculoskeletal system and connective tissue	23	51457	365	1568435	1.92069	0.0032324	8.6714	22	1	----->	5.722e-06
094.0	tabes dorsalis	infectious and parasitic diseases	713.5	arthropathy w/neurological disorder	diseases of the musculoskeletal system and connective tissue	142	155	246	1619737	6032.07	0	281360	50	44	----->	0.6063
110.1	dermatophytosis, nail	infectious and parasitic diseases	713.5	arthropathy w/neurological disorder	diseases of the musculoskeletal system and connective tissue	74	10310	314	1609582	36.7923	0	2041.6	45	24	----->	0.015432
110.4	dermatophytosis, foot	infectious and parasitic diseases	713.5	arthropathy w/neurological disorder	diseases of the musculoskeletal system and connective tissue	20	5336	368	1614556	16.4445	2.0178e-58	259.677	8	11	<-----	0.64761
112.9	candidiasis site nos	infectious and parasitic diseases	713.5	arthropathy w/neurological disorder	diseases of the musculoskeletal system and connective tissue	10	4128	378	1615764	10.3549	1.1285e-17	73.2739	4	6	<-----	0.75391
136.9	disease, infectious/parasitic nos	infectious and parasitic diseases	713.5	arthropathy w/neurological disorder	diseases of the musculoskeletal system and connective tissue	32	3706	356	1616186	39.2	3.8625e-230	1049.08	15	16	<-----	1
174.9	neop, mlig, female breast nos	neoplasms	713.5	arthropathy w/neurological disorder	diseases of the musculoskeletal system and connective tissue	10	20341	378	1599551	2.08034	0.034914	4.44938	8	2	----->	0.10937
202.00	lymphm, mlig, ndlr, unspc site	neoplasms	713.5	arthropathy w/neurological disorder	diseases of the musculoskeletal system and connective tissue	10	13379	378	1606513	3.17665	0.00041559	12.4608	6	4	----->	0.75391
211.1	neop, bng, stomach	neoplasms	713.5	arthropathy w/neurological disorder	diseases of the musculoskeletal system and connective tissue	17	8000	371	1611892	9.23254	5.0618e-26	111.31	9	8	----->	1
211.3	neop, bng, large intestine	neoplasms	713.5	arthropathy w/neurological disorder	diseases of the musculoskeletal system and connective tissue	71	45201	317	1574691	7.80273	1.8996e-75	337.825	46	25	----->	0.016995
211.4	neop, bng, rectum/anus	neoplasms	713.5	arthropathy w/neurological disorder	diseases of the musculoskeletal system and connective tissue	11	8275	377	1611617	5.68257	1.3466e-09	36.7447	5	6	<-----	1
216.5	neop, bng, skin, trunk	neoplasms	713.5	arthropathy w/neurological disorder	diseases of the musculoskeletal system and connective tissue	15	28558	373	1591334	2.24087	0.0031362	8.72647	9	6	----->	0.60724
216.6	neop, bng, skin, arm	neoplasms	713.5	arthropathy w/neurological disorder	diseases of the musculoskeletal system and connective tissue	11	6602	377	1613290	7.12998	1.2399e-12	50.4221	7	4	----->	0.54883
217	neoplasm, benign, breast	neoplasms	713.5	arthropathy w/neurological disorder	diseases of the musculoskeletal system and connective tissue	14	15055	374	1604837	3.99031	1.6755e-07	27.3754	8	6	----->	0.79053
235.2	neop, ub, stomach/intestine	neoplasms	713.5	arthropathy w/neurological disorder	diseases of the musculoskeletal system and connective tissue	17	10649	371	1609243	6.92449	2.0214e-18	76.6691	15	2	----->	0.0023499
238.0	neop, ub, bone	neoplasms	713.5	arthropathy w/neurological disorder	diseases of the musculoskeletal system and connective tissue	40	6009	348	1613883	30.871	3.0131e-220	1003.57	15	22	<-----	0.32401
238.1	neop, ub, soft tissue	neoplasms	713.5	arthropathy w/neurological disorder	diseases of the musculoskeletal system and connective tissue	23	15359	365	1604533	6.58295	6.7015e-23	97.0672	13	10	----->	0.67764
238.2	neop, ub, skin	neoplasms	713.5	arthropathy w/neurological disorder	diseases of the musculoskeletal system and connective tissue	26	50008	362	1569884	2.25472	7.2561e-05	15.7429	21	5	----->	0.0024939
239.0	neop, nos, digestive system	neoplasms	713.5	arthropathy w/neurological disorder	diseases of the musculoskeletal system and connective tissue	10	8767	378	1611125	4.86168	3.0948e-07	26.1896	6	4	----->	0.75391
239.2	neop, nos, bone/soft tissue/skin	neoplasms	713.5	arthropathy w/neurological disorder	diseases of the musculoskeletal system and connective tissue	15	14592	373	1605300	4.42409	3.4192e-09	34.9292	8	7	----->	1
239.8	neop, nos, site nec	neoplasms	713.5	arthropathy w/neurological disorder	diseases of the musculoskeletal system and connective tissue	14	8670	374	1611222	6.95653	1.9915e-15	63.0733	12	2	----->	0.012939
241.0	goiter, nontoxic uninodular	endocrine, nutritional and metabolic diseases, and immunity disorders	713.5	arthropathy w/neurological disorder	diseases of the musculoskeletal system and connective tissue	13	8065	375	1611827	6.92829	2.6053e-14	58.012	9	4	----->	0.26685
242.90	thyrotoxicosis nos, no crisis	endocrine, nutritional and metabolic diseases, and immunity disorders	713.5	arthropathy w/neurological disorder	diseases of the musculoskeletal system and connective tissue	12	7266	376	1612626	7.08324	1.2779e-13	54.885	9	3	----->	0.146
244.9	hypothyroidism nos	endocrine, nutritional and metabolic diseases, and immunity disorders	713.5	arthropathy w/neurological disorder	diseases of the musculoskeletal system and connective tissue	42	31827	346	1588065	6.05684	3.1954e-35	153.36	32	10	----->	0.00094067
246.9	disorder, thyroid nos	endocrine, nutritional and metabolic diseases, and immunity disorders	713.5	arthropathy w/neurological disorder	diseases of the musculoskeletal system and connective tissue	12	9183	376	1610709	5.59791	3.2843e-10	39.4978	6	6	------	1
250.00	dm, uncomplicated, type ii	endocrine, nutritional and metabolic diseases, and immunity disorders	713.5	arthropathy w/neurological disorder	diseases of the musculoskeletal system and connective tissue	243	47550	145	1572342	55.4159	0	4807.65	212	27	----->	8.5178e-37
250.01	dm, uncomplicated, type i	endocrine, nutritional and metabolic diseases, and immunity disorders	713.5	arthropathy w/neurological disorder	diseases of the musculoskeletal system and connective tissue	170	18025	218	1601867	69.3017	0	6331.91	138	31	----->	2.5736e-17
250.02	dm, uncomplicated, type ii, uncntrl	endocrine, nutritional and metabolic diseases, and immunity disorders	713.5	arthropathy w/neurological disorder	diseases of the musculoskeletal system and connective tissue	125	14174	263	1605718	53.8432	0	4320.38	87	38	----->	1.3863e-05
250.03	dm, uncomplicated, type i, uncntrl	endocrine, nutritional and metabolic diseases, and immunity disorders	713.5	arthropathy w/neurological disorder	diseases of the musculoskeletal system and connective tissue	51	4797	337	1615095	50.9529	0	2103.7	26	25	----->	1
250.10	dm w/ketoacidosis, type ii	endocrine, nutritional and metabolic diseases, and immunity disorders	713.5	arthropathy w/neurological disorder	diseases of the musculoskeletal system and connective tissue	23	1254	365	1618638	81.3368	0	1612.48	14	9	----->	0.40487
250.11	dm w/ketoacidosis, type i	endocrine, nutritional and metabolic diseases, and immunity disorders	713.5	arthropathy w/neurological disorder	diseases of the musculoskeletal system and connective tissue	27	1714	361	1618178	70.6109	0	1633.99	22	5	----->	0.0015137
250.40	dm w/renal mnfst, type ii	endocrine, nutritional and metabolic diseases, and immunity disorders	713.5	arthropathy w/neurological disorder	diseases of the musculoskeletal system and connective tissue	105	4811	283	1615081	124.555	0	9098.35	73	31	----->	4.657e-05
250.41	dm w/renal mnfst, type i	endocrine, nutritional and metabolic diseases, and immunity disorders	713.5	arthropathy w/neurological disorder	diseases of the musculoskeletal system and connective tissue	81	2883	307	1617009	147.984	0	8988.32	68	13	----->	3.8084e-10
250.42	dm w/renal mnfst, type ii, uncntrl	endocrine, nutritional and metabolic diseases, and immunity disorders	713.5	arthropathy w/neurological disorder	diseases of the musculoskeletal system and connective tissue	27	635	361	1619257	190.721	0	4379.88	7	20	<-----	0.019157
250.43	dm w/renal mnfst, type i, uncntrl	endocrine, nutritional and metabolic diseases, and immunity disorders	713.5	arthropathy w/neurological disorder	diseases of the musculoskeletal system and connective tissue	20	536	368	1619356	164.195	0	2818.74	5	15	<-----	0.041389
250.50	dm w/eye mnfst, type ii	endocrine, nutritional and metabolic diseases, and immunity disorders	713.5	arthropathy w/neurological disorder	diseases of the musculoskeletal system and connective tissue	108	5836	280	1614056	106.677	0	7936.32	76	30	----->	9.1027e-06
250.51	dm w/eye mnfst, type i	endocrine, nutritional and metabolic diseases, and immunity disorders	713.5	arthropathy w/neurological disorder	diseases of the musculoskeletal system and connective tissue	81	3194	307	1616698	133.549	0	8121.16	57	24	----->	0.00031732
250.52	dm w/eye mnfst, type ii, uncntrl	endocrine, nutritional and metabolic diseases, and immunity disorders	713.5	arthropathy w/neurological disorder	diseases of the musculoskeletal system and connective tissue	30	1422	358	1618470	95.3769	0	2446.98	9	21	<-----	0.042774
250.53	dm w/eye mnfst, type i, uncntrl	endocrine, nutritional and metabolic diseases, and immunity disorders	713.5	arthropathy w/neurological disorder	diseases of the musculoskeletal system and connective tissue	39	1174	349	1618718	154.079	0	5031.18	14	25	<-----	0.10813
250.60	dm w/neuro mnfst, type ii	endocrine, nutritional and metabolic diseases, and immunity disorders	713.5	arthropathy w/neurological disorder	diseases of the musculoskeletal system and connective tissue	241	6015	147	1613877	439.88	0	38286.7	158	46	----->	1.4169e-15
250.61	dm w/neuro mnfst, type i	endocrine, nutritional and metabolic diseases, and immunity disorders	713.5	arthropathy w/neurological disorder	diseases of the musculoskeletal system and connective tissue	117	2291	271	1617601	304.834	0	23345	74	34	----->	0.0001491
250.62	dm w/neuro mnfst, type ii, uncntrl	endocrine, nutritional and metabolic diseases, and immunity disorders	713.5	arthropathy w/neurological disorder	diseases of the musculoskeletal system and connective tissue	39	838	349	1619054	215.902	0	6986.64	12	24	<-----	0.065245
250.63	dm w/neuro mnfst, type i, uncntrl	endocrine, nutritional and metabolic diseases, and immunity disorders	713.5	arthropathy w/neurological disorder	diseases of the musculoskeletal system and connective tissue	26	353	362	1619539	329.52	0	7117.18	6	20	<-----	0.0093553
250.70	dm w/crcltry dsord, type ii	endocrine, nutritional and metabolic diseases, and immunity disorders	713.5	arthropathy w/neurological disorder	diseases of the musculoskeletal system and connective tissue	81	1530	307	1618362	279.081	0	16657.8	44	30	----->	0.13018
250.71	dm w/crcltry dsord, type i	endocrine, nutritional and metabolic diseases, and immunity disorders	713.5	arthropathy w/neurological disorder	diseases of the musculoskeletal system and connective tissue	26	511	362	1619381	227.611	0	5008.66	16	10	----->	0.32694
250.80	dm w/mnfst nec, type ii	endocrine, nutritional and metabolic diseases, and immunity disorders	713.5	arthropathy w/neurological disorder	diseases of the musculoskeletal system and connective tissue	122	3799	266	1616093	195.108	0	15521.4	85	33	----->	1.843e-06
250.81	dm w/mnfst nec, type i	endocrine, nutritional and metabolic diseases, and immunity disorders	713.5	arthropathy w/neurological disorder	diseases of the musculoskeletal system and connective tissue	75	3078	313	1616814	125.866	0	7218.54	63	12	----->	1.6938e-09
250.82	dm w/mnfst nec, type ii, uncntrl	endocrine, nutritional and metabolic diseases, and immunity disorders	713.5	arthropathy w/neurological disorder	diseases of the musculoskeletal system and connective tissue	17	344	371	1619548	215.73	0	3117.86	9	8	----->	1
250.83	dm w/mnfst nec, type i, uncntrl	endocrine, nutritional and metabolic diseases, and immunity disorders	713.5	arthropathy w/neurological disorder	diseases of the musculoskeletal system and connective tissue	14	424	374	1619468	142.976	0	1711.59	8	6	----->	0.79053
250.90	dm w/cmpl nos, type ii	endocrine, nutritional and metabolic diseases, and immunity disorders	713.5	arthropathy w/neurological disorder	diseases of the musculoskeletal system and connective tissue	131	1938	257	1617954	425.55	0	34164.4	96	35	----->	9.3953e-08
250.91	dm w/cmpl nos, type i	endocrine, nutritional and metabolic diseases, and immunity disorders	713.5	arthropathy w/neurological disorder	diseases of the musculoskeletal system and connective tissue	39	1034	349	1618858	174.955	0	5697.12	26	12	----->	0.033552
250.92	dm w/cmpl nos, type ii, uncntrl	endocrine, nutritional and metabolic diseases, and immunity disorders	713.5	arthropathy w/neurological disorder	diseases of the musculoskeletal system and connective tissue	17	671	371	1619221	110.575	0	1620.73	4	13	<-----	0.049042
251.2	hypoglycemia nos	endocrine, nutritional and metabolic diseases, and immunity disorders	713.5	arthropathy w/neurological disorder	diseases of the musculoskeletal system and connective tissue	29	4839	359	1615053	26.9609	7.3126e-142	643.034	22	7	----->	0.0081301
268.9	deficiency, vitamin d nos	endocrine, nutritional and metabolic diseases, and immunity disorders	713.5	arthropathy w/neurological disorder	diseases of the musculoskeletal system and connective tissue	10	1633	378	1618259	26.2162	8.1281e-48	211.045	4	6	<-----	0.75391
272.0	hypercholesterolemia, pure	endocrine, nutritional and metabolic diseases, and immunity disorders	713.5	arthropathy w/neurological disorder	diseases of the musculoskeletal system and connective tissue	82	23878	306	1596014	17.9115	7.0439e-223	1015.67	60	22	----->	3.2317e-05
272.2	hyperlipidemia, mixed	endocrine, nutritional and metabolic diseases, and immunity disorders	713.5	arthropathy w/neurological disorder	diseases of the musculoskeletal system and connective tissue	29	4604	359	1615288	28.3412	1.5367e-149	678.337	13	16	<-----	0.71107
272.4	hyperlipidemia nec/nos	endocrine, nutritional and metabolic diseases, and immunity disorders	713.5	arthropathy w/neurological disorder	diseases of the musculoskeletal system and connective tissue	173	71687	215	1548205	17.3778	6.36850617489367e-321	1466.81	132	40	----->	1.1114e-12
274.0	gouty arthropathy	endocrine, nutritional and metabolic diseases, and immunity disorders	713.5	arthropathy w/neurological disorder	diseases of the musculoskeletal system and connective tissue	12	1601	376	1618291	32.2596	1.3297e-71	320.17	8	4	----->	0.3877
274.9	gout nos	endocrine, nutritional and metabolic diseases, and immunity disorders	713.5	arthropathy w/neurological disorder	diseases of the musculoskeletal system and connective tissue	28	6353	360	1613539	19.754	2.0718e-98	443.3	21	6	----->	0.0059246
276.1	hyposmolality/hyponatremia	endocrine, nutritional and metabolic diseases, and immunity disorders	713.5	arthropathy w/neurological disorder	diseases of the musculoskeletal system and connective tissue	28	6190	360	1613702	20.2763	3.1591e-101	456.243	14	14	------	1
276.2	acidosis	endocrine, nutritional and metabolic diseases, and immunity disorders	713.5	arthropathy w/neurological disorder	diseases of the musculoskeletal system and connective tissue	21	5078	367	1614814	18.1963	2.1601e-68	305.432	12	9	----->	0.66362
276.3	alkalosis	endocrine, nutritional and metabolic diseases, and immunity disorders	713.5	arthropathy w/neurological disorder	diseases of the musculoskeletal system and connective tissue	13	3995	375	1615897	14.022	4.1134e-32	139.136	13	0	----->	0.00024414
276.5	disorder, volume depletion	endocrine, nutritional and metabolic diseases, and immunity disorders	713.5	arthropathy w/neurological disorder	diseases of the musculoskeletal system and connective tissue	84	53181	304	1566711	8.14026	2.9866e-90	405.815	76	8	----->	5.0214e-15
276.51	dsord volume depletion, dehydration	endocrine, nutritional and metabolic diseases, and immunity disorders	713.5	arthropathy w/neurological disorder	diseases of the musculoskeletal system and connective tissue	27	8848	361	1611044	13.6182	4.1874e-63	281.164	6	21	<-----	0.0059246
276.6	overload, fluid	endocrine, nutritional and metabolic diseases, and immunity disorders	713.5	arthropathy w/neurological disorder	diseases of the musculoskeletal system and connective tissue	55	8171	333	1611721	32.5787	3.268e-308	1408.32	32	23	----->	0.28061
276.7	hyperpotassemia	endocrine, nutritional and metabolic diseases, and immunity disorders	713.5	arthropathy w/neurological disorder	diseases of the musculoskeletal system and connective tissue	64	6517	324	1613375	48.9015	0	2443.75	32	32	------	1
276.8	hypopotassemia	endocrine, nutritional and metabolic diseases, and immunity disorders	713.5	arthropathy w/neurological disorder	diseases of the musculoskeletal system and connective tissue	14	4410	374	1615482	13.7126	9.9568e-34	146.527	9	5	----->	0.42395
278.00	obesity nos	endocrine, nutritional and metabolic diseases, and immunity disorders	713.5	arthropathy w/neurological disorder	diseases of the musculoskeletal system and connective tissue	52	21191	336	1598701	11.6756	2.4284e-95	429.199	39	13	----->	0.00040954
278.01	obesity, morbid	endocrine, nutritional and metabolic diseases, and immunity disorders	713.5	arthropathy w/neurological disorder	diseases of the musculoskeletal system and connective tissue	23	5732	365	1614160	17.745	1.2048e-72	324.958	14	9	----->	0.40487
280.0	anemia d/t chronic blood loss	diseases of the blood and blood-forming organs	713.5	arthropathy w/neurological disorder	diseases of the musculoskeletal system and connective tissue	16	6984	372	1612908	9.93305	1.0005e-26	114.524	9	7	----->	0.80362
280.9	anemia, iron deficiency nos	diseases of the blood and blood-forming organs	713.5	arthropathy w/neurological disorder	diseases of the musculoskeletal system and connective tissue	32	9952	356	1609940	14.5412	1.4734e-79	356.699	18	14	----->	0.59661
285.29	anemia, chronic disease nec	diseases of the blood and blood-forming organs	713.5	arthropathy w/neurological disorder	diseases of the musculoskeletal system and connective tissue	10	993	378	1618899	43.1299	1.0892e-79	357.302	5	5	------	1
285.9	anemia nos	diseases of the blood and blood-forming organs	713.5	arthropathy w/neurological disorder	diseases of the musculoskeletal system and connective tissue	98	36001	290	1583891	14.8675	3.304e-205	934.376	58	40	----->	0.085411
286.9	defect, coagulation nec/nos	diseases of the blood and blood-forming organs	713.5	arthropathy w/neurological disorder	diseases of the musculoskeletal system and connective tissue	15	12595	373	1607297	5.13193	3.2841e-11	43.9998	11	4	----->	0.11847
288.8	disease, white blood cell nec	diseases of the blood and blood-forming organs	713.5	arthropathy w/neurological disorder	diseases of the musculoskeletal system and connective tissue	14	3860	374	1616032	15.6718	4.8657e-39	170.833	6	8	<-----	0.79053
293.0	delirium, d/t cce	mental disorders	713.5	arthropathy w/neurological disorder	diseases of the musculoskeletal system and connective tissue	14	3460	374	1616432	17.4879	5.8467e-44	193.369	9	5	----->	0.42395
296.20	dprsv dsord, major sngl epsd unspc	mental disorders	713.5	arthropathy w/neurological disorder	diseases of the musculoskeletal system and connective tissue	21	14284	367	1605608	6.43195	1.9067e-20	85.8854	14	7	----->	0.18925
296.30	dprsv dsord, major rcr, unspc	mental disorders	713.5	arthropathy w/neurological disorder	diseases of the musculoskeletal system and connective tissue	18	13849	370	1606043	5.64169	5.4701e-15	61.0836	9	9	------	1
296.32	dprsv dsord, major recurrent, mod	mental disorders	713.5	arthropathy w/neurological disorder	diseases of the musculoskeletal system and connective tissue	10	8700	378	1611192	4.89932	2.6291e-07	26.5046	5	5	------	1
298.9	nonorganic psychosis nos	mental disorders	713.5	arthropathy w/neurological disorder	diseases of the musculoskeletal system and connective tissue	21	11748	367	1608144	7.83275	4.0056e-26	111.773	12	9	----->	0.66362
300.00	anxiety state nos	mental disorders	713.5	arthropathy w/neurological disorder	diseases of the musculoskeletal system and connective tissue	28	40778	360	1579114	3.01192	9.2011e-09	33.0031	16	12	----->	0.57159
305.1	disorder, tobacco use	mental disorders	713.5	arthropathy w/neurological disorder	diseases of the musculoskeletal system and connective tissue	15	16185	373	1603707	3.98469	5.9564e-08	29.3775	10	5	----->	0.30176
309.0	disorder, adjustment w/dprsd mood	mental disorders	713.5	arthropathy w/neurological disorder	diseases of the musculoskeletal system and connective tissue	14	10134	374	1609758	5.94615	1.0452e-12	50.7573	8	6	----->	0.79053
309.28	dsord, adjst w/mix anx/dprsd mood	mental disorders	713.5	arthropathy w/neurological disorder	diseases of the musculoskeletal system and connective tissue	26	9609	362	1610283	12.0362	5.9544e-53	234.588	11	15	<-----	0.5572
309.9	reaction, adjustment nos	mental disorders	713.5	arthropathy w/neurological disorder	diseases of the musculoskeletal system and connective tissue	12	7888	376	1612004	6.52218	2.4944e-12	49.0506	9	3	----->	0.146
310.1	personality change d/t cce	mental disorders	713.5	arthropathy w/neurological disorder	diseases of the musculoskeletal system and connective tissue	14	7977	374	1611915	7.56413	4.5578e-17	70.5193	6	8	<-----	0.79053
311	disorder, depressive nec	mental disorders	713.5	arthropathy w/neurological disorder	diseases of the musculoskeletal system and connective tissue	79	68832	309	1551060	5.76112	7.3653e-55	243.337	52	27	----->	0.0065533
327.23	dsord, orgnc obst sleep apnea	diseases of the nervous system	713.5	arthropathy w/neurological disorder	diseases of the musculoskeletal system and connective tissue	12	4409	376	1615483	11.6938	2.9015e-24	103.286	0	12	<-----	0.00048828
331.9	degeneration, cerebral nos	diseases of the nervous system	713.5	arthropathy w/neurological disorder	diseases of the musculoskeletal system and connective tissue	12	5165	376	1614727	9.97751	2.6823e-20	85.2106	8	4	----->	0.3877
333.99	disease, extrapyramidal nec	diseases of the nervous system	713.5	arthropathy w/neurological disorder	diseases of the musculoskeletal system and connective tissue	10	2924	378	1616968	14.6296	8.0807e-26	110.382	6	4	----->	0.75391
337.1	neurp, priph autonomic in dsord ce	diseases of the nervous system	713.5	arthropathy w/neurological disorder	diseases of the musculoskeletal system and connective tissue	20	344	368	1619548	255.869	0	4325.5	14	6	----->	0.11532
338.18	pain, acute, postoperative nec	diseases of the nervous system	713.5	arthropathy w/neurological disorder	diseases of the musculoskeletal system and connective tissue	26	6526	362	1613366	17.7562	1.0386e-81	366.582	7	19	<-----	0.028959
344.1	paraplegia	diseases of the nervous system	713.5	arthropathy w/neurological disorder	diseases of the musculoskeletal system and connective tissue	16	2089	372	1617803	33.3092	3.57e-99	446.809	13	3	----->	0.021271
344.61	synd, cauda equina w/neuro bladder	diseases of the nervous system	713.5	arthropathy w/neurological disorder	diseases of the musculoskeletal system and connective tissue	15	3398	373	1616494	19.1308	7.2604e-52	229.607	8	7	----->	1
344.9	paralysis nos	diseases of the nervous system	713.5	arthropathy w/neurological disorder	diseases of the musculoskeletal system and connective tissue	10	3263	378	1616629	13.1069	6.4202e-23	97.1521	8	1	----->	0.039062
346.90	migraine nos w/o migrain w/o status	diseases of the nervous system	713.5	arthropathy w/neurological disorder	diseases of the musculoskeletal system and connective tissue	17	23253	371	1596639	3.14632	3.1105e-06	21.7471	11	6	----->	0.33231
348.8	brain conditions nec	diseases of the nervous system	713.5	arthropathy w/neurological disorder	diseases of the musculoskeletal system and connective tissue	19	13663	369	1606229	6.05325	2.9819e-17	71.3564	8	11	<-----	0.64761
353.6	phantom limb (syndrome)	diseases of the nervous system	713.5	arthropathy w/neurological disorder	diseases of the musculoskeletal system and connective tissue	23	742	365	1619150	137.505	0	2720.63	2	21	<-----	6.6042e-05
354.0	syndrome, carpal tunnel	diseases of the nervous system	713.5	arthropathy w/neurological disorder	diseases of the musculoskeletal system and connective tissue	28	16165	360	1603727	7.71632	1.7622e-33	145.393	18	10	----->	0.18493
354.2	lesion, ulnar nerve	diseases of the nervous system	713.5	arthropathy w/neurological disorder	diseases of the musculoskeletal system and connective tissue	13	4247	375	1615645	13.1879	5.1148e-30	129.56	7	6	----->	1
355.8	mononeuritis, lower limb nos	diseases of the nervous system	713.5	arthropathy w/neurological disorder	diseases of the musculoskeletal system and connective tissue	35	4173	353	1615719	38.3894	9.1571e-245	1116.37	21	13	----->	0.22948
355.9	mononeuritis nos	diseases of the nervous system	713.5	arthropathy w/neurological disorder	diseases of the musculoskeletal system and connective tissue	93	12369	295	1607523	40.9717	0	2706.62	68	25	----->	9.3756e-06
356.0	neuropathy, hereditary peripheral	diseases of the nervous system	713.5	arthropathy w/neurological disorder	diseases of the musculoskeletal system and connective tissue	11	305	377	1619587	154.937	2.26259999983636e-314	1436.67	6	5	----->	1
356.1	atrophy, peroneal muscular	diseases of the nervous system	713.5	arthropathy w/neurological disorder	diseases of the musculoskeletal system and connective tissue	53	471	335	1619421	543.964	0	21873.2	36	16	----->	0.0077874
356.9	neuropathy, idiopathic priph nos	diseases of the nervous system	713.5	arthropathy w/neurological disorder	diseases of the musculoskeletal system and connective tissue	161	11269	227	1608623	101.244	0	9160.11	122	36	----->	3.8817e-12
357.2	polyneuropathy in diabetes	diseases of the nervous system	713.5	arthropathy w/neurological disorder	diseases of the musculoskeletal system and connective tissue	146	1907	242	1617985	511.872	0	42836.1	66	62	----->	0.79101
359.9	myopathy nos	diseases of the nervous system	713.5	arthropathy w/neurological disorder	diseases of the musculoskeletal system and connective tissue	16	4555	372	1615337	15.2529	2.9272e-43	190.164	9	7	----->	0.80362
362.01	retinopathy, diabetic, background	diseases of the sense organs	713.5	arthropathy w/neurological disorder	diseases of the musculoskeletal system and connective tissue	90	6383	298	1613509	76.3436	0	5011.48	69	21	----->	3.8818e-07
362.02	retinopathy, diabetic proliferative	diseases of the sense organs	713.5	arthropathy w/neurological disorder	diseases of the musculoskeletal system and connective tissue	54	3443	334	1616449	75.9053	0	3319.78	39	15	----->	0.0014963
362.10	retinopathy, background nos	diseases of the sense organs	713.5	arthropathy w/neurological disorder	diseases of the musculoskeletal system and connective tissue	10	1304	378	1618588	32.8373	2.5114e-60	268.417	9	1	----->	0.021484
362.56	puckering, macular	diseases of the sense organs	713.5	arthropathy w/neurological disorder	diseases of the musculoskeletal system and connective tissue	13	5986	375	1613906	9.3466	2.2692e-20	85.5413	7	6	----->	1
362.83	edema, retinal	diseases of the sense organs	713.5	arthropathy w/neurological disorder	diseases of the musculoskeletal system and connective tissue	41	5502	347	1614390	34.6691	2.5858e-254	1160.3	26	15	----->	0.11728
365.00	preglaucoma nos	diseases of the sense organs	713.5	arthropathy w/neurological disorder	diseases of the musculoskeletal system and connective tissue	28	12422	360	1607470	10.0648	4.0741e-46	203.253	20	8	----->	0.035698
365.04	glaucoma, ocular hypertension	diseases of the sense organs	713.5	arthropathy w/neurological disorder	diseases of the musculoskeletal system and connective tissue	15	5093	373	1614799	12.7505	2.6257e-33	144.601	11	4	----->	0.11847
365.11	glaucoma, primary open-angle	diseases of the sense organs	713.5	arthropathy w/neurological disorder	diseases of the musculoskeletal system and connective tissue	11	10175	377	1609717	4.61601	2.2406e-07	26.8136	8	3	----->	0.22656
366.10	cataract, senile nos	diseases of the sense organs	713.5	arthropathy w/neurological disorder	diseases of the musculoskeletal system and connective tissue	30	9812	358	1610080	13.7508	2.183e-70	314.591	15	15	------	1
366.14	cataract, posterior subcapsular	diseases of the sense organs	713.5	arthropathy w/neurological disorder	diseases of the musculoskeletal system and connective tissue	41	6512	347	1613380	29.2736	5.9817e-213	969.993	25	16	----->	0.21102
366.15	cataract, cortical senile	diseases of the sense organs	713.5	arthropathy w/neurological disorder	diseases of the musculoskeletal system and connective tissue	33	11471	355	1608421	13.0342	2.4412e-72	323.55	23	10	----->	0.035082
366.16	cataract, senile nuclear	diseases of the sense organs	713.5	arthropathy w/neurological disorder	diseases of the musculoskeletal system and connective tissue	110	46668	278	1573224	13.3389	3.1732e-195	888.455	73	37	----->	0.00076899
366.19	cataract, senile nec	diseases of the sense organs	713.5	arthropathy w/neurological disorder	diseases of the musculoskeletal system and connective tissue	38	7634	350	1612258	22.9297	2.5248e-153	695.739	23	15	----->	0.25588
366.50	after-cataract nos	diseases of the sense organs	713.5	arthropathy w/neurological disorder	diseases of the musculoskeletal system and connective tissue	14	4802	374	1615090	12.5902	1.1009e-30	132.609	4	10	<-----	0.17957
366.53	after-cataract obscuring vision	diseases of the sense organs	713.5	arthropathy w/neurological disorder	diseases of the musculoskeletal system and connective tissue	10	3491	378	1616401	12.2492	2.7667e-21	89.7035	5	5	------	1
366.9	cataract nos	diseases of the sense organs	713.5	arthropathy w/neurological disorder	diseases of the musculoskeletal system and connective tissue	21	7022	367	1612870	13.1429	9.0506e-48	210.83	13	8	----->	0.38331
367.0	hypermetropia	diseases of the sense organs	713.5	arthropathy w/neurological disorder	diseases of the musculoskeletal system and connective tissue	16	22701	372	1597191	3.02614	1.397e-05	18.8732	11	5	----->	0.21011
367.1	myopia	diseases of the sense organs	713.5	arthropathy w/neurological disorder	diseases of the musculoskeletal system and connective tissue	60	66305	328	1553587	4.28614	5.6274e-29	124.801	40	20	----->	0.013489
367.21	astigmatism, regular	diseases of the sense organs	713.5	arthropathy w/neurological disorder	diseases of the musculoskeletal system and connective tissue	13	17899	375	1601993	3.10273	6.6895e-05	15.8967	7	6	----->	1
367.4	presbyopia	diseases of the sense organs	713.5	arthropathy w/neurological disorder	diseases of the musculoskeletal system and connective tissue	49	30725	339	1589167	7.47608	7.7375e-53	234.066	33	16	----->	0.021294
367.9	disorder, refraction nos	diseases of the sense organs	713.5	arthropathy w/neurological disorder	diseases of the musculoskeletal system and connective tissue	10	7134	378	1612758	5.98059	2.3841e-09	35.6314	4	6	<-----	0.75391
368.2	diplopia	diseases of the sense organs	713.5	arthropathy w/neurological disorder	diseases of the musculoskeletal system and connective tissue	11	6894	377	1612998	6.82675	5.3782e-12	47.544	3	8	<-----	0.22656
368.8	disturbance, visual nec	diseases of the sense organs	713.5	arthropathy w/neurological disorder	diseases of the musculoskeletal system and connective tissue	21	17939	367	1601953	5.10981	3.9712e-15	61.7141	9	12	<-----	0.66362
372.30	conjunctivitis nos	diseases of the sense organs	713.5	arthropathy w/neurological disorder	diseases of the musculoskeletal system and connective tissue	13	43236	375	1576656	1.26416	0.49956	0.455866	8	5	----->	0.58105
373.00	blepharitis nos	diseases of the sense organs	713.5	arthropathy w/neurological disorder	diseases of the musculoskeletal system and connective tissue	26	24413	362	1595479	4.69391	2.7302e-16	66.989	18	8	----->	0.075519
375.15	insufficiency, tear film nos	diseases of the sense organs	713.5	arthropathy w/neurological disorder	diseases of the musculoskeletal system and connective tissue	39	26765	349	1593127	6.65154	2.3971e-37	163.085	25	14	----->	0.10813
379.21	degeneration, vitreous body	diseases of the sense organs	713.5	arthropathy w/neurological disorder	diseases of the musculoskeletal system and connective tissue	19	17021	369	1602871	4.84887	7.1258e-13	51.5093	11	8	----->	0.64761
379.23	hemorrhage, vitreous	diseases of the sense organs	713.5	arthropathy w/neurological disorder	diseases of the musculoskeletal system and connective tissue	27	3862	361	1616030	31.2964	4.3291e-155	703.86	18	9	----->	0.12208
379.91	pain in or around eye	diseases of the sense organs	713.5	arthropathy w/neurological disorder	diseases of the musculoskeletal system and connective tissue	12	8880	376	1611012	5.79001	1.1934e-10	41.4758	5	7	<-----	0.77441
380.10	otitis externa, infective nos	diseases of the sense organs	713.5	arthropathy w/neurological disorder	diseases of the musculoskeletal system and connective tissue	18	22315	370	1597577	3.48286	1.2098e-07	28.0053	10	8	----->	0.81453
380.4	impacted cerumen	diseases of the sense organs	713.5	arthropathy w/neurological disorder	diseases of the musculoskeletal system and connective tissue	31	30074	357	1589818	4.59039	1.9996e-18	76.6906	23	8	----->	0.010674
381.81	dysfunction, eustachian tube	diseases of the sense organs	713.5	arthropathy w/neurological disorder	diseases of the musculoskeletal system and connective tissue	11	26790	377	1593102	1.73509	0.10416	2.64073	6	5	----->	1
382.9	otitis media nos	diseases of the sense organs	713.5	arthropathy w/neurological disorder	diseases of the musculoskeletal system and connective tissue	26	92365	362	1527527	1.18781	0.45983	0.546305	18	8	----->	0.075519
386.10	vertigo, peripheral nos	diseases of the sense organs	713.5	arthropathy w/neurological disorder	diseases of the musculoskeletal system and connective tissue	12	6004	376	1613888	8.57879	4.5562e-17	70.52	8	4	----->	0.3877
388.70	otalgia nos	diseases of the sense organs	713.5	arthropathy w/neurological disorder	diseases of the musculoskeletal system and connective tissue	13	19007	375	1600885	2.91984	0.00018007	14.0284	8	5	----->	0.58105
389.11	loss, sensory hearing, bilateral	diseases of the sense organs	713.5	arthropathy w/neurological disorder	diseases of the musculoskeletal system and connective tissue	10	8521	378	1611371	5.0028	1.6789e-07	27.3715	6	4	----->	0.75391
401.0	hypertension, malignant essential	diseases of the circulatory system	713.5	arthropathy w/neurological disorder	diseases of the musculoskeletal system and connective tissue	21	5698	367	1614194	16.2101	2.7388e-60	268.244	12	8	----->	0.50344
401.1	hypertension, benign essential	diseases of the circulatory system	713.5	arthropathy w/neurological disorder	diseases of the musculoskeletal system and connective tissue	113	48658	275	1571234	13.2688	3.2842e-197	897.587	80	33	----->	1.1462e-05
401.9	hypertension, essential nos	diseases of the circulatory system	713.5	arthropathy w/neurological disorder	diseases of the musculoskeletal system and connective tissue	238	117154	150	1502738	20.3522	0	1681.88	196	42	----->	5.7061e-25
402.10	disease, htn heart, benign, w/o hf	diseases of the circulatory system	713.5	arthropathy w/neurological disorder	diseases of the musculoskeletal system and connective tissue	15	9806	373	1610086	6.60297	1.9157e-15	63.1498	14	1	----->	0.00097656
403.90	dis htn ckd nos w/ckd stgi-iv/unspc	diseases of the circulatory system	713.5	arthropathy w/neurological disorder	diseases of the musculoskeletal system and connective tissue	11	2489	377	1617403	18.9603	1.4739e-37	164.052	7	4	----->	0.54883
403.91	dis, htn ckd nos w/ckd stg v/esrd	diseases of the circulatory system	713.5	arthropathy w/neurological disorder	diseases of the musculoskeletal system and connective tissue	38	3823	350	1616069	45.8956	2.02039993783621e-317	1450.7	23	15	----->	0.25588
410.71	ami, subendocardial, initial	diseases of the circulatory system	713.5	arthropathy w/neurological disorder	diseases of the musculoskeletal system and connective tissue	15	4368	373	1615524	14.8735	1.7404e-39	172.878	5	10	<-----	0.30176
410.90	ami nos, unspecified	diseases of the circulatory system	713.5	arthropathy w/neurological disorder	diseases of the musculoskeletal system and connective tissue	25	7976	363	1611916	13.9184	3.8017e-60	267.591	19	6	----->	0.014633
410.91	ami nos, initial	diseases of the circulatory system	713.5	arthropathy w/neurological disorder	diseases of the musculoskeletal system and connective tissue	25	7302	363	1612590	15.2095	2.136e-66	296.274	18	7	----->	0.043285
411.1	syndrome, intermediate coronary	diseases of the circulatory system	713.5	arthropathy w/neurological disorder	diseases of the musculoskeletal system and connective tissue	38	12529	350	1607363	13.9288	1.1753e-88	398.488	31	7	----->	0.00011617
411.81	occlusion, acute, coronary w/o mi	diseases of the circulatory system	713.5	arthropathy w/neurological disorder	diseases of the musculoskeletal system and connective tissue	63	18667	325	1601225	16.6278	3.6859e-167	759.368	43	20	----->	0.0051524
411.89	disease, acute ischemic heart nec	diseases of the circulatory system	713.5	arthropathy w/neurological disorder	diseases of the musculoskeletal system and connective tissue	11	804	377	1619088	58.7578	1.9698e-120	544.509	6	5	----->	1
412	infarction, myocardial, old	diseases of the circulatory system	713.5	arthropathy w/neurological disorder	diseases of the musculoskeletal system and connective tissue	32	6934	356	1612958	20.9093	1.4452e-118	535.934	17	15	----->	0.86005
413.9	angina pectoris nec/nos	diseases of the circulatory system	713.5	arthropathy w/neurological disorder	diseases of the musculoskeletal system and connective tissue	41	14438	347	1605454	13.1385	8.2072e-89	399.204	33	8	----->	0.00011222
414.0	atherosclerosis, coronary	diseases of the circulatory system	713.5	arthropathy w/neurological disorder	diseases of the musculoskeletal system and connective tissue	18	10871	370	1609021	7.20051	2.1459e-20	85.6517	18	0	----->	7.6294e-06
414.00	athrsclr, coronary, vessel type nos	diseases of the circulatory system	713.5	arthropathy w/neurological disorder	diseases of the musculoskeletal system and connective tissue	155	55869	233	1564023	18.6229	0	1537.19	116	39	----->	4.509e-10
414.01	athrsclr, coronary, native artery	diseases of the circulatory system	713.5	arthropathy w/neurological disorder	diseases of the musculoskeletal system and connective tissue	97	32417	291	1587475	16.3235	2.2391e-226	1031.76	70	26	----->	8.0496e-06
414.02	athrsclr, coronary, autologous grft	diseases of the circulatory system	713.5	arthropathy w/neurological disorder	diseases of the musculoskeletal system and connective tissue	11	3004	377	1616888	15.7048	1.0493e-30	132.704	11	0	----->	0.00097656
414.05	athrsclr, coronary, bypass grft nos	diseases of the circulatory system	713.5	arthropathy w/neurological disorder	diseases of the musculoskeletal system and connective tissue	20	3055	368	1616837	28.7632	3.2618e-106	479.156	13	7	----->	0.26318
414.8	disease, ischemic heart, chrn nec	diseases of the circulatory system	713.5	arthropathy w/neurological disorder	diseases of the musculoskeletal system and connective tissue	21	4991	367	1614901	18.5145	1.0883e-69	311.388	16	5	----->	0.026604
414.9	disease, ischemic heart, chrn nos	diseases of the circulatory system	713.5	arthropathy w/neurological disorder	diseases of the musculoskeletal system and connective tissue	49	15725	339	1604167	14.7454	2.4987e-118	534.841	41	7	----->	6.2404e-07
415.19	embolism/infarction, pulmonary nec	diseases of the circulatory system	713.5	arthropathy w/neurological disorder	diseases of the musculoskeletal system and connective tissue	17	7046	371	1612846	10.4888	3.5996e-30	130.257	10	7	----->	0.62906
416.0	hypertension, primary pulmonary	diseases of the circulatory system	713.5	arthropathy w/neurological disorder	diseases of the musculoskeletal system and connective tissue	14	7914	374	1611978	7.62464	3.1278e-17	71.2622	11	3	----->	0.057373
416.8	disease, chrn pulmonary heart nec	diseases of the circulatory system	713.5	arthropathy w/neurological disorder	diseases of the musculoskeletal system and connective tissue	12	4661	376	1615231	11.0598	8.4652e-23	96.6046	6	6	------	1
421.0	endocarditis, acute/sub bacterial	diseases of the circulatory system	713.5	arthropathy w/neurological disorder	diseases of the musculoskeletal system and connective tissue	23	3892	365	1616000	26.164	3.7601e-110	497.255	16	7	----->	0.09314
423.9	disease, pericardium nos	diseases of the circulatory system	713.5	arthropathy w/neurological disorder	diseases of the musculoskeletal system and connective tissue	16	9504	372	1610388	7.28788	1.5944e-18	77.1377	10	6	----->	0.4545
424.0	disorder, mitral valve	diseases of the circulatory system	713.5	arthropathy w/neurological disorder	diseases of the musculoskeletal system and connective tissue	32	19474	356	1600418	7.38717	8.407e-36	156.014	27	5	----->	0.00011307
424.1	disorder, aortic valve	diseases of the circulatory system	713.5	arthropathy w/neurological disorder	diseases of the musculoskeletal system and connective tissue	13	13143	375	1606749	4.23805	1.225e-07	27.9811	7	6	----->	1
424.2	disorder, nonrhm tricuspid valve	diseases of the circulatory system	713.5	arthropathy w/neurological disorder	diseases of the musculoskeletal system and connective tissue	16	7748	372	1612144	8.94935	1.133e-23	100.587	11	5	----->	0.21011
424.90	endocarditis nos	diseases of the circulatory system	713.5	arthropathy w/neurological disorder	diseases of the musculoskeletal system and connective tissue	19	3611	369	1616281	23.0471	6.0182e-80	358.485	10	9	----->	1
425.4	cardiomyopathy, primary nec	diseases of the circulatory system	713.5	arthropathy w/neurological disorder	diseases of the musculoskeletal system and connective tissue	44	17598	344	1602294	11.6459	2.7385e-82	369.241	36	8	----->	2.5449e-05
426.0	block, av, complete	diseases of the circulatory system	713.5	arthropathy w/neurological disorder	diseases of the musculoskeletal system and connective tissue	10	4625	378	1615267	9.23934	1.5094e-15	63.6193	7	3	----->	0.34375
426.10	block, av nos	diseases of the circulatory system	713.5	arthropathy w/neurological disorder	diseases of the musculoskeletal system and connective tissue	18	2418	370	1617474	32.5426	6.9361e-109	491.437	9	9	------	1
426.11	block, av, 1st degree	diseases of the circulatory system	713.5	arthropathy w/neurological disorder	diseases of the musculoskeletal system and connective tissue	18	5658	370	1614234	13.8795	9.54e-44	192.395	10	8	----->	0.81453
426.2	hemiblock, left bundle branch	diseases of the circulatory system	713.5	arthropathy w/neurological disorder	diseases of the musculoskeletal system and connective tissue	14	2712	374	1617180	22.3216	4.8816e-57	253.33	7	7	------	1
426.4	block, right bundle branch	diseases of the circulatory system	713.5	arthropathy w/neurological disorder	diseases of the musculoskeletal system and connective tissue	17	5736	371	1614156	12.8947	4.0305e-38	166.629	9	7	----->	0.80362
427.1	tachycardia, paroxysmal ventricular	diseases of the circulatory system	713.5	arthropathy w/neurological disorder	diseases of the musculoskeletal system and connective tissue	21	9014	367	1610878	10.2258	7.2356e-36	156.312	13	8	----->	0.38331
427.31	fibrillation, atrial	diseases of the circulatory system	713.5	arthropathy w/neurological disorder	diseases of the musculoskeletal system and connective tissue	52	30666	336	1589226	8.02034	1.0782e-60	270.102	23	29	<-----	0.48846
427.32	flutter, atrial	diseases of the circulatory system	713.5	arthropathy w/neurological disorder	diseases of the musculoskeletal system and connective tissue	13	7505	375	1612387	7.44785	1.3068e-15	63.9033	5	7	<-----	0.77441
427.5	arrest, cardiac	diseases of the circulatory system	713.5	arthropathy w/neurological disorder	diseases of the musculoskeletal system and connective tissue	11	5586	377	1614306	8.43211	2.2523e-15	62.831	4	7	<-----	0.54883
427.61	premature beats, atrial	diseases of the circulatory system	713.5	arthropathy w/neurological disorder	diseases of the musculoskeletal system and connective tissue	10	3208	378	1616684	13.3321	2.391e-23	99.108	5	5	------	1
427.69	premature beats nec	diseases of the circulatory system	713.5	arthropathy w/neurological disorder	diseases of the musculoskeletal system and connective tissue	19	9551	369	1610341	8.68153	6.6127e-27	115.345	11	8	----->	0.64761
427.81	dysfunction, sinoatrial node	diseases of the circulatory system	713.5	arthropathy w/neurological disorder	diseases of the musculoskeletal system and connective tissue	27	11047	361	1608845	10.8925	6.7567e-49	215.996	15	11	----->	0.5572
427.89	dysrhythmias, cardiac nec	diseases of the circulatory system	713.5	arthropathy w/neurological disorder	diseases of the musculoskeletal system and connective tissue	112	52771	276	1567121	12.0508	1.7845e-175	797.611	65	46	----->	0.087089
427.9	dysrhythmia, cardiac nos	diseases of the circulatory system	713.5	arthropathy w/neurological disorder	diseases of the musculoskeletal system and connective tissue	168	148069	220	1471823	7.59063	1.5202e-119	540.43	153	13	----->	1.6818e-31
428.0	failure, congestive heart nos	diseases of the circulatory system	713.5	arthropathy w/neurological disorder	diseases of the musculoskeletal system and connective tissue	84	39840	304	1580052	10.9587	1.4962e-129	586.432	63	20	----->	2.4307e-06
428.1	failure, left heart	diseases of the circulatory system	713.5	arthropathy w/neurological disorder	diseases of the musculoskeletal system and connective tissue	12	2384	376	1617508	21.6538	3.023e-47	208.43	9	3	----->	0.146
428.9	failure, heart nos	diseases of the circulatory system	713.5	arthropathy w/neurological disorder	diseases of the musculoskeletal system and connective tissue	38	17270	350	1602622	10.0752	5.6196e-61	271.4	30	8	----->	0.00047199
429.2	disease, cardiovascular nos	diseases of the circulatory system	713.5	arthropathy w/neurological disorder	diseases of the musculoskeletal system and connective tissue	20	5723	368	1614169	15.3288	4.3959e-54	239.778	11	9	----->	0.8238
429.3	cardiomegaly	diseases of the circulatory system	713.5	arthropathy w/neurological disorder	diseases of the musculoskeletal system and connective tissue	36	9979	352	1609913	16.4997	5.2097e-102	459.84	22	14	----->	0.24298
429.9	disease, heart nos	diseases of the circulatory system	713.5	arthropathy w/neurological disorder	diseases of the musculoskeletal system and connective tissue	39	17008	349	1602884	10.5314	9.295e-66	293.343	35	4	----->	3.3532e-07
432.1	hemorrhage, subdural	diseases of the circulatory system	713.5	arthropathy w/neurological disorder	diseases of the musculoskeletal system and connective tissue	12	8246	376	1611646	6.23763	1.1232e-11	46.1008	10	2	----->	0.038574
433.10	oclsn, carotid artery w/o infrct	diseases of the circulatory system	713.5	arthropathy w/neurological disorder	diseases of the musculoskeletal system and connective tissue	22	9910	366	1609982	9.76538	1.6122e-35	154.72	8	14	<-----	0.28628
434.91	oclsn, cer artery nos w/infarction	diseases of the circulatory system	713.5	arthropathy w/neurological disorder	diseases of the musculoskeletal system and connective tissue	16	5885	372	1614007	11.796	1.6263e-32	140.979	7	9	<-----	0.80362
435.9	ischemia, transient cerebral nos	diseases of the circulatory system	713.5	arthropathy w/neurological disorder	diseases of the musculoskeletal system and connective tissue	20	8495	368	1611397	10.3091	1.454e-34	150.35	10	10	------	1
436	disease, acute cerbvas, ill-defined	diseases of the circulatory system	713.5	arthropathy w/neurological disorder	diseases of the musculoskeletal system and connective tissue	30	16464	358	1603428	8.16117	3.3102e-38	167.021	15	15	------	1
437.1	insfcy, acute cerebrovascular nos	diseases of the circulatory system	713.5	arthropathy w/neurological disorder	diseases of the musculoskeletal system and connective tissue	24	7848	364	1612044	13.5434	4.0489e-56	249.115	8	16	<-----	0.15159
437.9	disease, cerebrovascular nos	diseases of the circulatory system	713.5	arthropathy w/neurological disorder	diseases of the musculoskeletal system and connective tissue	12	6646	376	1613246	7.747	3.7788e-15	61.8119	6	6	------	1
440.0	atherosclerosis, aortic	diseases of the circulatory system	713.5	arthropathy w/neurological disorder	diseases of the musculoskeletal system and connective tissue	16	4567	372	1615325	15.2127	3.9026e-43	189.592	6	10	<-----	0.4545
440.1	atherosclerosis, renal artery	diseases of the circulatory system	713.5	arthropathy w/neurological disorder	diseases of the musculoskeletal system and connective tissue	11	2779	377	1617113	16.9787	2.1793e-33	144.971	11	0	----->	0.00097656
440.20	athrsclr, ntv artry, extrm nos	diseases of the circulatory system	713.5	arthropathy w/neurological disorder	diseases of the musculoskeletal system and connective tissue	11	1171	377	1618721	40.3335	2.8639e-82	369.151	6	5	----->	1
440.21	athrsclr, ntv artry, extrm w/claud	diseases of the circulatory system	713.5	arthropathy w/neurological disorder	diseases of the musculoskeletal system and connective tissue	93	10472	295	1609420	48.4508	0	3221.29	65	26	----->	5.3118e-05
440.22	athrsclr ntv artry extrm w/restpain	diseases of the circulatory system	713.5	arthropathy w/neurological disorder	diseases of the musculoskeletal system and connective tissue	12	1893	376	1617999	27.2785	3.5236e-60	267.742	6	6	------	1
440.23	athrsclr, ntv artry, extrm w/ulcrtn	diseases of the circulatory system	713.5	arthropathy w/neurological disorder	diseases of the musculoskeletal system and connective tissue	46	1147	342	1618745	189.822	0	7162.98	27	18	----->	0.23269
440.24	athrsclr, ntv artry, extrm w/gang	diseases of the circulatory system	713.5	arthropathy w/neurological disorder	diseases of the musculoskeletal system and connective tissue	19	1099	369	1618793	75.8439	3.0423e-272	1242.8	14	5	----->	0.063568
441.4	aneurysm, abdominal aortic	diseases of the circulatory system	713.5	arthropathy w/neurological disorder	diseases of the musculoskeletal system and connective tissue	11	9277	377	1610615	5.06565	2.6089e-08	30.9786	9	2	----->	0.06543
443.81	angiopathy peripheral in disease ce	diseases of the circulatory system	713.5	arthropathy w/neurological disorder	diseases of the musculoskeletal system and connective tissue	27	236	361	1619656	513.295	0	11102	9	15	<-----	0.30746
443.9	disease, peripheral vascular nos	diseases of the circulatory system	713.5	arthropathy w/neurological disorder	diseases of the musculoskeletal system and connective tissue	95	13519	293	1606373	38.5263	0	2575.79	66	29	----->	0.0001864
447.1	stricture, artery	diseases of the circulatory system	713.5	arthropathy w/neurological disorder	diseases of the musculoskeletal system and connective tissue	29	5272	359	1614620	24.7399	1.6849e-129	586.195	22	7	----->	0.0081301
447.6	arteritis nos	diseases of the circulatory system	713.5	arthropathy w/neurological disorder	diseases of the musculoskeletal system and connective tissue	11	3481	377	1616411	13.5487	3.6663e-26	111.949	10	1	----->	0.011719
453.8	acute ven emb thrmb otr spec veins	diseases of the circulatory system	713.5	arthropathy w/neurological disorder	diseases of the musculoskeletal system and connective tissue	45	12673	343	1607219	16.6385	9.9147e-126	568.865	25	20	----->	0.55148
453.9	thrombosis, venous nos	diseases of the circulatory system	713.5	arthropathy w/neurological disorder	diseases of the musculoskeletal system and connective tissue	24	9705	364	1610187	10.9393	5.258e-44	193.58	19	5	----->	0.0066108
454.0	vrcs vein, lwr extremities w/ulcer	diseases of the circulatory system	713.5	arthropathy w/neurological disorder	diseases of the musculoskeletal system and connective tissue	11	2180	377	1617712	21.6519	3.2437e-43	189.96	7	4	----->	0.54883
455.0	hemorrhoids, internal w/o compl	diseases of the circulatory system	713.5	arthropathy w/neurological disorder	diseases of the musculoskeletal system and connective tissue	19	14418	369	1605474	5.73357	4.3761e-16	66.0591	11	8	----->	0.64761
455.3	hemorrhoids, external w/o compl	diseases of the circulatory system	713.5	arthropathy w/neurological disorder	diseases of the musculoskeletal system and connective tissue	31	14255	357	1605637	9.78078	5.7908e-49	216.303	14	17	<-----	0.7201
455.6	hemorrhoids nos, w/o compl	diseases of the circulatory system	713.5	arthropathy w/neurological disorder	diseases of the musculoskeletal system and connective tissue	10	14611	378	1605281	2.90656	0.001278	10.3741	6	4	----->	0.75391
457.1	lymphedema nec	diseases of the circulatory system	713.5	arthropathy w/neurological disorder	diseases of the musculoskeletal system and connective tissue	11	1777	377	1618115	26.5689	1.5706e-53	237.242	8	2	----->	0.10937
458.0	hypotension, orthostatic	diseases of the circulatory system	713.5	arthropathy w/neurological disorder	diseases of the musculoskeletal system and connective tissue	26	5129	362	1614763	22.6121	4.2487e-106	478.628	16	10	----->	0.32694
458.9	hypotension nos	diseases of the circulatory system	713.5	arthropathy w/neurological disorder	diseases of the musculoskeletal system and connective tissue	49	13176	339	1606716	17.6259	2.4429e-144	654.42	21	28	<-----	0.3916
459.0	hemorrhage nos	diseases of the circulatory system	713.5	arthropathy w/neurological disorder	diseases of the musculoskeletal system and connective tissue	14	8043	374	1611849	7.50175	6.7187e-17	69.7538	9	4	----->	0.26685
459.2	compression, vein	diseases of the circulatory system	713.5	arthropathy w/neurological disorder	diseases of the musculoskeletal system and connective tissue	10	1715	378	1618177	24.9615	1.9306e-45	200.156	7	3	----->	0.34375
459.81	insufficiency, venous nos	diseases of the circulatory system	713.5	arthropathy w/neurological disorder	diseases of the musculoskeletal system and connective tissue	53	10693	335	1609199	23.809	4.0462e-214	975.374	36	17	----->	0.01266
459.9	disease, circulatory nos	diseases of the circulatory system	713.5	arthropathy w/neurological disorder	diseases of the musculoskeletal system and connective tissue	10	4280	378	1615612	9.98623	5.6921e-17	70.0809	4	6	<-----	0.75391
461.9	sinusitis, acute nos	diseases of the respiratory system	713.5	arthropathy w/neurological disorder	diseases of the musculoskeletal system and connective tissue	49	74429	339	1545463	3.00132	1.0458e-13	55.279	35	14	----->	0.0038017
462	pharyngitis, acute	diseases of the respiratory system	713.5	arthropathy w/neurological disorder	diseases of the musculoskeletal system and connective tissue	33	95568	355	1524324	1.48269	0.038443	4.28529	24	9	----->	0.013531
464.10	tracheitis, acute, w/o obstruction	diseases of the respiratory system	713.5	arthropathy w/neurological disorder	diseases of the musculoskeletal system and connective tissue	11	7799	377	1612093	6.03118	2.51e-10	40.023	8	3	----->	0.22656
465.9	infct up rsprt mlt sites, acute nos	diseases of the respiratory system	713.5	arthropathy w/neurological disorder	diseases of the musculoskeletal system and connective tissue	93	171313	295	1448579	2.66571	1.994e-17	72.1505	78	15	----->	1.9393e-11
466.0	bronchitis, acute	diseases of the respiratory system	713.5	arthropathy w/neurological disorder	diseases of the musculoskeletal system and connective tissue	75	68044	313	1551848	5.46483	4.6813e-49	216.727	58	17	----->	2.1823e-06
472.0	rhinitis, chronic	diseases of the respiratory system	713.5	arthropathy w/neurological disorder	diseases of the musculoskeletal system and connective tissue	14	21055	374	1598837	2.84253	0.00015112	14.3582	8	6	----->	0.79053
473.9	sinusitis, chronic nos	diseases of the respiratory system	713.5	arthropathy w/neurological disorder	diseases of the musculoskeletal system and connective tissue	35	35891	353	1584001	4.37586	4.2653e-19	79.7425	29	6	----->	0.00011684
477.9	rhinitis, allergic nos	diseases of the respiratory system	713.5	arthropathy w/neurological disorder	diseases of the musculoskeletal system and connective tissue	40	78135	348	1541757	2.26804	8.4992e-07	24.2413	32	8	----->	0.00018217
478.1	disease, nasal cavity and sinus nec	diseases of the respiratory system	713.5	arthropathy w/neurological disorder	diseases of the musculoskeletal system and connective tissue	21	18263	367	1601629	5.01814	9.2319e-15	60.0534	15	6	----->	0.078354
486	pneumonia, organism nos	diseases of the respiratory system	713.5	arthropathy w/neurological disorder	diseases of the musculoskeletal system and connective tissue	104	76459	284	1543433	7.39221	2.5305e-92	415.333	67	37	----->	0.0042325
490	bronchitis nos	diseases of the respiratory system	713.5	arthropathy w/neurological disorder	diseases of the musculoskeletal system and connective tissue	18	9911	370	1609981	7.90267	7.6784e-23	96.7977	12	6	----->	0.23788
491.20	bronchitis, obstr chrn w/o exacrb	diseases of the respiratory system	713.5	arthropathy w/neurological disorder	diseases of the musculoskeletal system and connective tissue	10	3994	378	1615898	10.7032	2.4468e-18	76.292	5	5	------	1
491.21	bronchitis, obstr chrn w/exacrb	diseases of the respiratory system	713.5	arthropathy w/neurological disorder	diseases of the musculoskeletal system and connective tissue	15	6789	373	1613103	9.55518	5.2147e-24	102.124	9	6	----->	0.60724
493.00	asthma, extrinsic nos	diseases of the respiratory system	713.5	arthropathy w/neurological disorder	diseases of the musculoskeletal system and connective tissue	13	14050	375	1605842	3.96222	5.7672e-07	24.9885	7	6	----->	1
493.90	asthma nos w/o status asthmaticus	diseases of the respiratory system	713.5	arthropathy w/neurological disorder	diseases of the musculoskeletal system and connective tissue	46	68492	342	1551400	3.0466	2.1735e-13	53.8414	39	7	----->	1.8315e-06
496	obstruction, chronic airway nec	diseases of the respiratory system	713.5	arthropathy w/neurological disorder	diseases of the musculoskeletal system and connective tissue	39	25669	349	1594223	6.94032	1.8915e-39	172.712	27	11	----->	0.013853
507.0	pneumonitis d/t food/vomit inhal	diseases of the respiratory system	713.5	arthropathy w/neurological disorder	diseases of the musculoskeletal system and connective tissue	11	6349	377	1613543	7.41526	3.1148e-13	53.1344	5	6	<-----	1
511.9	effusion, pleural nos	diseases of the respiratory system	713.5	arthropathy w/neurological disorder	diseases of the musculoskeletal system and connective tissue	59	40128	329	1579764	7.05994	2.5587e-57	254.617	35	24	----->	0.19253
512.8	pneumothorax, spontaneous nec	diseases of the respiratory system	713.5	arthropathy w/neurological disorder	diseases of the musculoskeletal system and connective tissue	52	38558	336	1581334	6.34707	6.0935e-45	197.869	37	15	----->	0.0031853
514	congestion/hypostasis, pulmonary	diseases of the respiratory system	713.5	arthropathy w/neurological disorder	diseases of the musculoskeletal system and connective tissue	26	10789	362	1609103	10.7119	2.6878e-46	204.081	16	10	----->	0.32694
518.0	collapse, pulmonary	diseases of the respiratory system	713.5	arthropathy w/neurological disorder	diseases of the musculoskeletal system and connective tissue	56	23074	332	1596818	11.673	1.8644e-101	457.295	40	16	----->	0.0018416
518.3	eosinophilia, pulmonary	diseases of the respiratory system	713.5	arthropathy w/neurological disorder	diseases of the musculoskeletal system and connective tissue	125	101487	263	1518405	7.11101	1.0578e-97	440.046	113	11	----->	1.7582e-22
518.4	edema, acute lung nos	diseases of the respiratory system	713.5	arthropathy w/neurological disorder	diseases of the musculoskeletal system and connective tissue	39	12136	349	1607756	14.8042	3.4026e-97	437.715	19	20	<-----	1
518.5	insfcy, pulmonary, psttraum/surg	diseases of the respiratory system	713.5	arthropathy w/neurological disorder	diseases of the musculoskeletal system and connective tissue	33	20747	355	1599145	7.16503	2.0356e-35	154.256	19	14	----->	0.48685
518.81	failure, acute respiratory	diseases of the respiratory system	713.5	arthropathy w/neurological disorder	diseases of the musculoskeletal system and connective tissue	16	13153	372	1606739	5.25409	2.9132e-12	48.7462	9	7	----->	0.80362
518.82	insufficiency, pulmonary nec	diseases of the respiratory system	713.5	arthropathy w/neurological disorder	diseases of the musculoskeletal system and connective tissue	22	14705	366	1605187	6.56149	6.855e-22	92.4643	13	9	----->	0.52347
518.89	disease, lung, other nec	diseases of the respiratory system	713.5	arthropathy w/neurological disorder	diseases of the musculoskeletal system and connective tissue	107	83684	281	1536208	6.99013	2.0961e-87	392.74	67	39	----->	0.008417
519.1	disease, trachea/bronchus nec	diseases of the respiratory system	713.5	arthropathy w/neurological disorder	diseases of the musculoskeletal system and connective tissue	10	7696	378	1612196	5.54193	1.6129e-08	31.9123	8	2	----->	0.10937
519.9	disease, respiratory system nos	diseases of the respiratory system	713.5	arthropathy w/neurological disorder	diseases of the musculoskeletal system and connective tissue	15	6809	373	1613083	9.52699	6.2978e-24	101.75	10	5	----->	0.30176
530.10	esophagitis nos	diseases of the digestive system	713.5	arthropathy w/neurological disorder	diseases of the musculoskeletal system and connective tissue	18	8784	370	1611108	8.92284	2.1098e-26	113.045	13	5	----->	0.096252
530.11	esophagitis, reflux	diseases of the digestive system	713.5	arthropathy w/neurological disorder	diseases of the musculoskeletal system and connective tissue	46	29448	342	1590444	7.26431	2.8748e-48	213.114	33	13	----->	0.0045339
530.81	reflux, esophageal	diseases of the digestive system	713.5	arthropathy w/neurological disorder	diseases of the musculoskeletal system and connective tissue	64	64857	324	1555035	4.73607	2.1717e-35	154.128	48	16	----->	7.7331e-05
530.9	disorder, esophageal nos	diseases of the digestive system	713.5	arthropathy w/neurological disorder	diseases of the musculoskeletal system and connective tissue	20	13171	368	1606721	6.62985	2.6268e-20	85.2518	12	8	----->	0.50344
535.50	gastritis nos w/o hemorrhage	diseases of the digestive system	713.5	arthropathy w/neurological disorder	diseases of the musculoskeletal system and connective tissue	23	11896	365	1607996	8.51763	1.7501e-31	136.26	14	9	----->	0.40487
536.3	gastroparesis	diseases of the digestive system	713.5	arthropathy w/neurological disorder	diseases of the musculoskeletal system and connective tissue	29	3427	359	1616465	38.1027	1.0366e-203	927.491	19	10	----->	0.13605
536.8	disorder, stomach function nec	diseases of the digestive system	713.5	arthropathy w/neurological disorder	diseases of the musculoskeletal system and connective tissue	33	18836	355	1601056	7.90139	4.9821e-40	175.365	23	10	----->	0.035082
537.89	disorder, gastroduodenal nec	diseases of the digestive system	713.5	arthropathy w/neurological disorder	diseases of the musculoskeletal system and connective tissue	16	7989	372	1611903	8.67808	7.8677e-23	96.7495	7	9	<-----	0.80362
550.90	hernia, unilt ingui w/o obst/gngr	diseases of the digestive system	713.5	arthropathy w/neurological disorder	diseases of the musculoskeletal system and connective tissue	15	14200	373	1605692	4.54733	1.5278e-09	36.4986	11	4	----->	0.11847
553.20	hernia, ventral nos w/o obst/gngr	diseases of the digestive system	713.5	arthropathy w/neurological disorder	diseases of the musculoskeletal system and connective tissue	10	4336	378	1615556	9.85691	1.0041e-16	68.9615	8	2	----->	0.10937
553.21	hernia, incsnl ventrl w/o obst/gngr	diseases of the digestive system	713.5	arthropathy w/neurological disorder	diseases of the musculoskeletal system and connective tissue	13	4858	375	1615034	11.5249	7.6904e-26	110.48	7	6	----->	1
553.3	hernia, diaphragmatic w/o obst/gngr	diseases of the digestive system	713.5	arthropathy w/neurological disorder	diseases of the musculoskeletal system and connective tissue	22	14009	366	1605883	6.89046	2.7704e-23	98.8164	16	6	----->	0.052479
558.9	gastroenteritis/colitis noninfc nec	diseases of the digestive system	713.5	arthropathy w/neurological disorder	diseases of the musculoskeletal system and connective tissue	53	40325	335	1579567	6.19719	3.1155e-44	194.622	46	7	----->	4.0032e-08
560.9	obstruction, intestinal nos	diseases of the digestive system	713.5	arthropathy w/neurological disorder	diseases of the musculoskeletal system and connective tissue	30	20630	358	1599262	6.49619	1.1097e-28	123.453	25	5	----->	0.00032491
562.10	diverticulosis, colon w/o hem	diseases of the digestive system	713.5	arthropathy w/neurological disorder	diseases of the musculoskeletal system and connective tissue	61	32637	327	1587255	9.07232	1.2143e-80	361.677	38	23	----->	0.072177
564.0	constipation	diseases of the digestive system	713.5	arthropathy w/neurological disorder	diseases of the musculoskeletal system and connective tissue	25	19518	363	1600374	5.64702	3.0027e-20	84.9874	23	2	----->	1.9431e-05
564.00	constipation nos	diseases of the digestive system	713.5	arthropathy w/neurological disorder	diseases of the musculoskeletal system and connective tissue	35	31801	353	1588091	4.9514	8.1786e-23	96.6728	10	25	<-----	0.016674
564.1	irritable bowel syndrome	diseases of the digestive system	713.5	arthropathy w/neurological disorder	diseases of the musculoskeletal system and connective tissue	12	18771	376	1601121	2.72226	0.00089592	11.0312	10	2	----->	0.038574
564.5	diarrhea, functional	diseases of the digestive system	713.5	arthropathy w/neurological disorder	diseases of the musculoskeletal system and connective tissue	15	6983	373	1612909	9.2886	3.1067e-23	98.5895	7	8	<-----	1
567.2	peritonitis, suppurative nec	diseases of the digestive system	713.5	arthropathy w/neurological disorder	diseases of the musculoskeletal system and connective tissue	13	4868	375	1615024	11.5011	8.8225e-26	110.208	12	1	----->	0.003418
569.0	polyp, anal and rectal	diseases of the digestive system	713.5	arthropathy w/neurological disorder	diseases of the musculoskeletal system and connective tissue	11	6999	377	1612893	6.72389	8.8445e-12	46.5691	4	7	<-----	0.54883
569.3	hemorrhage, rectal & anal	diseases of the digestive system	713.5	arthropathy w/neurological disorder	diseases of the musculoskeletal system and connective tissue	21	14083	367	1605809	6.52457	8.052e-21	87.5903	12	9	----->	0.66362
569.89	disorder, intestinal nec	diseases of the digestive system	713.5	arthropathy w/neurological disorder	diseases of the musculoskeletal system and connective tissue	13	7806	375	1612086	7.15932	6.8892e-15	60.6296	7	6	----->	1
569.9	disorder, intestinal nos	diseases of the digestive system	713.5	arthropathy w/neurological disorder	diseases of the musculoskeletal system and connective tissue	14	9223	374	1610669	6.53718	2.6887e-14	57.95	11	3	----->	0.057373
573.3	hepatitis nos	diseases of the digestive system	713.5	arthropathy w/neurological disorder	diseases of the musculoskeletal system and connective tissue	11	9221	377	1610671	5.0966	2.2492e-08	31.2665	7	4	----->	0.54883
573.8	disorder, liver nec	diseases of the digestive system	713.5	arthropathy w/neurological disorder	diseases of the musculoskeletal system and connective tissue	15	21338	373	1598554	3.0127	2.925e-05	17.4659	9	6	----->	0.60724
573.9	disorder, liver nos	diseases of the digestive system	713.5	arthropathy w/neurological disorder	diseases of the musculoskeletal system and connective tissue	11	14729	377	1605163	3.17978	0.00019339	13.8943	3	8	<-----	0.22656
574.20	chlthias w/o chlcyst w/o obst	diseases of the digestive system	713.5	arthropathy w/neurological disorder	diseases of the musculoskeletal system and connective tissue	24	12823	364	1607069	8.26332	1.3995e-31	136.704	14	10	----->	0.54126
576.9	disorder, biliary tract nos	diseases of the digestive system	713.5	arthropathy w/neurological disorder	diseases of the musculoskeletal system and connective tissue	16	4639	372	1615253	14.9759	2.1241e-42	186.221	7	9	<-----	0.80362
577.0	pancreatitis, acute	diseases of the digestive system	713.5	arthropathy w/neurological disorder	diseases of the musculoskeletal system and connective tissue	19	8643	369	1611249	9.59899	2.7323e-30	130.805	15	4	----->	0.019211
578.0	hematemesis	diseases of the digestive system	713.5	arthropathy w/neurological disorder	diseases of the musculoskeletal system and connective tissue	17	5977	371	1613915	12.3729	2.138e-36	158.735	7	10	<-----	0.62906
578.1	blood in stool	diseases of the digestive system	713.5	arthropathy w/neurological disorder	diseases of the musculoskeletal system and connective tissue	37	29369	351	1590523	5.70881	3.8691e-29	125.544	17	20	<-----	0.74283
578.9	hemorrhage, gastrointestinal nos	diseases of the digestive system	713.5	arthropathy w/neurological disorder	diseases of the musculoskeletal system and connective tissue	36	20018	352	1599874	8.17382	3.935e-45	198.739	22	14	----->	0.24298
583.81	nephritis/nephropathy in disease ce	diseases of the genitourinary system	713.5	arthropathy w/neurological disorder	diseases of the musculoskeletal system and connective tissue	18	1163	370	1618729	67.7119	3.6524e-230	1049.19	14	3	----->	0.012726
583.9	nephritis w/unspecified kidney lsn	diseases of the genitourinary system	713.5	arthropathy w/neurological disorder	diseases of the musculoskeletal system and connective tissue	16	3786	372	1616106	18.3597	6.5489e-53	234.398	12	4	----->	0.076813
584.5	acute kidney fail w/tblr necrosis	diseases of the genitourinary system	713.5	arthropathy w/neurological disorder	diseases of the musculoskeletal system and connective tissue	14	3806	374	1616086	15.8947	1.211e-39	173.599	6	8	<-----	0.79053
584.9	acute kidney failure, unspecified	diseases of the genitourinary system	713.5	arthropathy w/neurological disorder	diseases of the musculoskeletal system and connective tissue	100	16246	288	1603646	34.2744	0	2358.52	51	49	----->	0.92041
585.1	kidney disease, chronic, stage i	diseases of the genitourinary system	713.5	arthropathy w/neurological disorder	diseases of the musculoskeletal system and connective tissue	16	1841	372	1618051	37.8021	5.1372e-113	510.421	5	11	<-----	0.21011
585.2	kidney disease, chronic, stage ii	diseases of the genitourinary system	713.5	arthropathy w/neurological disorder	diseases of the musculoskeletal system and connective tissue	12	1541	376	1618351	33.5169	1.7573e-74	333.388	2	10	<-----	0.038574
585.3	kidney disease, chronic, stage iii	diseases of the genitourinary system	713.5	arthropathy w/neurological disorder	diseases of the musculoskeletal system and connective tissue	30	2481	358	1617411	54.6301	1.5684e-304	1391.38	12	17	<-----	0.45826
585.4	kidney disease, chronic, stage iv	diseases of the genitourinary system	713.5	arthropathy w/neurological disorder	diseases of the musculoskeletal system and connective tissue	17	1285	371	1618607	57.7183	5.4065e-185	841.392	8	9	<-----	1
585.5	kidney disease, chronic, stage v	diseases of the genitourinary system	713.5	arthropathy w/neurological disorder	diseases of the musculoskeletal system and connective tissue	16	848	372	1619044	82.1183	5.2442e-248	1131.28	8	8	------	1
585.6	renal disease, end stage	diseases of the genitourinary system	713.5	arthropathy w/neurological disorder	diseases of the musculoskeletal system and connective tissue	57	5144	331	1614748	54.0568	0	2459.85	28	29	<-----	1
585.9	kidney disease, chronic nos	diseases of the genitourinary system	713.5	arthropathy w/neurological disorder	diseases of the musculoskeletal system and connective tissue	50	4230	338	1615662	56.502	0	2299.35	19	31	<-----	0.11892
585	kidney disease, chronic	diseases of the genitourinary system	713.5	arthropathy w/neurological disorder	diseases of the musculoskeletal system and connective tissue	64	10809	324	1609083	29.4055	7.65829999998332e-314	1434.23	49	15	----->	2.4365e-05
586	renal failure nos	diseases of the genitourinary system	713.5	arthropathy w/neurological disorder	diseases of the musculoskeletal system and connective tissue	67	10517	321	1609375	31.94	0	1625.36	40	27	----->	0.14207
590.10	pyelonephritis, acute nos	diseases of the genitourinary system	713.5	arthropathy w/neurological disorder	diseases of the musculoskeletal system and connective tissue	13	3725	375	1616167	15.0408	1.1377e-34	150.837	11	2	----->	0.022461
590.80	pyelonephritis nos	diseases of the genitourinary system	713.5	arthropathy w/neurological disorder	diseases of the musculoskeletal system and connective tissue	16	6855	372	1613037	10.1208	2.6128e-27	117.187	8	8	------	1
591	hydronephrosis	diseases of the genitourinary system	713.5	arthropathy w/neurological disorder	diseases of the musculoskeletal system and connective tissue	42	17651	346	1602241	11.0187	4.6978e-74	331.427	27	15	----->	0.08843
592.0	calculus, kidney	diseases of the genitourinary system	713.5	arthropathy w/neurological disorder	diseases of the musculoskeletal system and connective tissue	27	22662	361	1597230	5.2714	8.788e-20	82.8644	19	8	----->	0.052239
592.9	calculus, urinary nos	diseases of the genitourinary system	713.5	arthropathy w/neurological disorder	diseases of the musculoskeletal system and connective tissue	10	7052	378	1612840	6.05044	1.7578e-09	36.2252	6	4	----->	0.75391
593.2	cyst, kidney, acquired	diseases of the genitourinary system	713.5	arthropathy w/neurological disorder	diseases of the musculoskeletal system and connective tissue	12	8418	376	1611474	6.10953	2.2101e-11	44.7752	8	4	----->	0.3877
593.81	disorder, vascular, kidney	diseases of the genitourinary system	713.5	arthropathy w/neurological disorder	diseases of the musculoskeletal system and connective tissue	24	1896	364	1617996	56.2664	1.9715e-253	1156.24	18	6	----->	0.022656
593.89	disorder, renal & ureteral nec	diseases of the genitourinary system	713.5	arthropathy w/neurological disorder	diseases of the musculoskeletal system and connective tissue	20	7995	368	1611897	10.9572	4.4018e-37	161.877	15	5	----->	0.041389
593.9	disorder, renal & ureteral nos	diseases of the genitourinary system	713.5	arthropathy w/neurological disorder	diseases of the musculoskeletal system and connective tissue	119	33606	269	1586286	20.8814	0	1542.31	79	40	----->	0.00044531
596.54	neurogenic bladder nos	diseases of the genitourinary system	713.5	arthropathy w/neurological disorder	diseases of the musculoskeletal system and connective tissue	22	5165	366	1614727	18.7919	4.4546e-74	331.533	15	7	----->	0.1338
596.9	disorder, bladder nos	diseases of the genitourinary system	713.5	arthropathy w/neurological disorder	diseases of the musculoskeletal system and connective tissue	12	7005	376	1612887	7.34834	3.1336e-14	57.6488	12	0	----->	0.00048828
599.0	infection, urinary tract nos	diseases of the genitourinary system	713.5	arthropathy w/neurological disorder	diseases of the musculoskeletal system and connective tissue	101	82557	287	1537335	6.55321	2.0635e-77	346.843	63	38	----->	0.016506
599.7	hematuria	diseases of the genitourinary system	713.5	arthropathy w/neurological disorder	diseases of the musculoskeletal system and connective tissue	32	25466	356	1594426	5.62786	3.7734e-25	107.328	18	14	----->	0.59661
600.00	hyprtrphy prst bng w/o urinary obst	diseases of the genitourinary system	713.5	arthropathy w/neurological disorder	diseases of the musculoskeletal system and connective tissue	16	8517	372	1611375	8.13743	3.7342e-21	89.1102	5	11	<-----	0.21011
607.84	impotence, organic origin	diseases of the genitourinary system	713.5	arthropathy w/neurological disorder	diseases of the musculoskeletal system and connective tissue	33	10687	355	1609205	13.9972	2.0603e-78	351.438	27	6	----->	0.00032406
611.71	mastodynia	diseases of the genitourinary system	713.5	arthropathy w/neurological disorder	diseases of the musculoskeletal system and connective tissue	17	12153	371	1607739	6.06188	1.3577e-15	63.828	11	6	----->	0.33231
611.72	lump or mass in breast	diseases of the genitourinary system	713.5	arthropathy w/neurological disorder	diseases of the musculoskeletal system and connective tissue	34	37702	354	1582190	4.0306	1.7881e-16	67.8235	27	7	----->	0.0008214
611.9	disorder, breast nos	diseases of the genitourinary system	713.5	arthropathy w/neurological disorder	diseases of the musculoskeletal system and connective tissue	31	29480	357	1590412	4.68463	5.7188e-19	79.1631	29	2	----->	4.6287e-07
616.10	vaginitis nos	diseases of the genitourinary system	713.5	arthropathy w/neurological disorder	diseases of the musculoskeletal system and connective tissue	23	39131	365	1580761	2.54554	1.4293e-05	18.8296	15	8	----->	0.21004
620.2	cyst, ovarian nec/nos	diseases of the genitourinary system	713.5	arthropathy w/neurological disorder	diseases of the musculoskeletal system and connective tissue	12	17410	376	1602482	2.93757	0.00030905	13.0147	8	4	----->	0.3877
621.0	polyp, corpus uteri	diseases of the genitourinary system	713.5	arthropathy w/neurological disorder	diseases of the musculoskeletal system and connective tissue	12	8111	376	1611781	6.34198	6.4699e-12	47.1818	9	3	----->	0.146
625.6	incontinence, female stress	diseases of the genitourinary system	713.5	arthropathy w/neurological disorder	diseases of the musculoskeletal system and connective tissue	12	9269	376	1610623	5.54568	4.3242e-10	38.9607	6	6	------	1
625.8	symp assoc w/fem genital organs nec	diseases of the genitourinary system	713.5	arthropathy w/neurological disorder	diseases of the musculoskeletal system and connective tissue	21	26511	367	1593381	3.43912	1.5178e-08	32.0304	17	4	----->	0.0071974
625.9	symp assoc w/fem genital organs nos	diseases of the genitourinary system	713.5	arthropathy w/neurological disorder	diseases of the musculoskeletal system and connective tissue	27	42197	361	1577695	2.79639	1.7589e-07	27.2814	17	10	----->	0.24779
626.2	excessive menstruation	diseases of the genitourinary system	713.5	arthropathy w/neurological disorder	diseases of the musculoskeletal system and connective tissue	13	13135	375	1606757	4.24065	1.2072e-07	28.0095	9	4	----->	0.26685
626.8	disorder, menstrual nec	diseases of the genitourinary system	713.5	arthropathy w/neurological disorder	diseases of the musculoskeletal system and connective tissue	16	14180	372	1605712	4.87044	4.3185e-11	43.4639	11	5	----->	0.21011
626.9	disorder, menstrual nos	diseases of the genitourinary system	713.5	arthropathy w/neurological disorder	diseases of the musculoskeletal system and connective tissue	12	12646	376	1607246	4.05623	1.0395e-06	23.8535	7	5	----->	0.77441
627.1	bleeding, postmenopausal	diseases of the genitourinary system	713.5	arthropathy w/neurological disorder	diseases of the musculoskeletal system and connective tissue	10	6754	378	1613138	6.31857	5.4516e-10	38.5085	8	2	----->	0.10937
627.2	state symp menpause/fem climacteric	diseases of the genitourinary system	713.5	arthropathy w/neurological disorder	diseases of the musculoskeletal system and connective tissue	19	19508	369	1600384	4.22414	1.2553e-10	41.3769	14	5	----->	0.063568
681.10	cellulitis/abscess, toe nos	diseases of the skin and subcutaneous tissue	713.5	arthropathy w/neurological disorder	diseases of the musculoskeletal system and connective tissue	54	1620	334	1618272	161.504	0	7042.56	35	18	----->	0.027008
681.11	cellulitis/abscess, toe, onychia	diseases of the skin and subcutaneous tissue	713.5	arthropathy w/neurological disorder	diseases of the musculoskeletal system and connective tissue	21	2048	367	1617844	45.2022	6.1545e-178	808.936	10	10	------	1
682.0	cellulitis/abscess, face	diseases of the skin and subcutaneous tissue	713.5	arthropathy w/neurological disorder	diseases of the musculoskeletal system and connective tissue	22	6340	366	1613552	15.298	3.7367e-59	263.037	13	9	----->	0.52347
682.2	cellulitis/abscess, trunk	diseases of the skin and subcutaneous tissue	713.5	arthropathy w/neurological disorder	diseases of the musculoskeletal system and connective tissue	17	6642	371	1613250	11.1296	2.7493e-32	139.936	10	7	----->	0.62906
682.3	cellulitis/abscess, arm	diseases of the skin and subcutaneous tissue	713.5	arthropathy w/neurological disorder	diseases of the musculoskeletal system and connective tissue	18	4914	370	1614978	15.9883	3.9607e-51	226.229	11	7	----->	0.48068
682.6	cellulitis/abscess, leg	diseases of the skin and subcutaneous tissue	713.5	arthropathy w/neurological disorder	diseases of the musculoskeletal system and connective tissue	87	11087	301	1608805	41.9413	0	2644.83	65	22	----->	4.3487e-06
682.7	cellulitis/abscess, foot	diseases of the skin and subcutaneous tissue	713.5	arthropathy w/neurological disorder	diseases of the musculoskeletal system and connective tissue	98	4081	290	1615811	133.799	0	9331.68	71	26	----->	5.4586e-06
682.8	cellulitis/abscess, site nec	diseases of the skin and subcutaneous tissue	713.5	arthropathy w/neurological disorder	diseases of the musculoskeletal system and connective tissue	29	4549	359	1615343	28.6848	1.8873e-151	687.123	13	16	<-----	0.71107
682.9	cellulitis/abscess nos	diseases of the skin and subcutaneous tissue	713.5	arthropathy w/neurological disorder	diseases of the musculoskeletal system and connective tissue	77	15720	311	1604172	25.2655	0	1411.94	55	22	----->	0.0002168
686.9	infct, local skin/sbcutn tissue nos	diseases of the skin and subcutaneous tissue	713.5	arthropathy w/neurological disorder	diseases of the musculoskeletal system and connective tissue	44	6270	344	1613622	32.9176	1.3144e-256	1170.86	26	18	----->	0.29122
692.9	dermatitis, contact, nos	diseases of the skin and subcutaneous tissue	713.5	arthropathy w/neurological disorder	diseases of the musculoskeletal system and connective tissue	52	72069	336	1547823	3.32382	3.5371e-17	71.0195	41	11	----->	3.5888e-05
695.3	rosacea	diseases of the skin and subcutaneous tissue	713.5	arthropathy w/neurological disorder	diseases of the musculoskeletal system and connective tissue	13	11632	375	1608260	4.79307	5.3058e-09	34.0739	11	2	----->	0.022461
695.9	erythematous condition nos	diseases of the skin and subcutaneous tissue	713.5	arthropathy w/neurological disorder	diseases of the musculoskeletal system and connective tissue	12	1838	376	1618054	28.0958	4.6865e-62	276.351	3	9	<-----	0.146
696.1	psoriasis nec	diseases of the skin and subcutaneous tissue	713.5	arthropathy w/neurological disorder	diseases of the musculoskeletal system and connective tissue	10	11393	378	1608499	3.735	3.9303e-05	16.9047	8	2	----->	0.10937
698.9	pruritic disorder nos	diseases of the skin and subcutaneous tissue	713.5	arthropathy w/neurological disorder	diseases of the musculoskeletal system and connective tissue	13	7635	375	1612257	7.32044	2.7231e-15	62.4571	11	2	----->	0.022461
700	corns and callosities	diseases of the skin and subcutaneous tissue	713.5	arthropathy w/neurological disorder	diseases of the musculoskeletal system and connective tissue	105	3884	283	1616008	154.372	0	11254.5	72	33	----->	0.00017836
701.9	hypertrophic/atrophic skin nos	diseases of the skin and subcutaneous tissue	713.5	arthropathy w/neurological disorder	diseases of the musculoskeletal system and connective tissue	30	20467	358	1599425	6.54859	5.5779e-29	124.818	23	7	----->	0.0052229
702.0	keratosis, actinic	diseases of the skin and subcutaneous tissue	713.5	arthropathy w/neurological disorder	diseases of the musculoskeletal system and connective tissue	24	26863	364	1593029	3.91002	1.1912e-11	45.9856	18	6	----->	0.022656
702.11	keratosis, seborrheic, inflamed	diseases of the skin and subcutaneous tissue	713.5	arthropathy w/neurological disorder	diseases of the musculoskeletal system and connective tissue	17	13428	371	1606464	5.48195	1.0606e-13	55.2513	12	4	----->	0.076813
702.19	keratosis, seborrheic nec	diseases of the skin and subcutaneous tissue	713.5	arthropathy w/neurological disorder	diseases of the musculoskeletal system and connective tissue	22	21345	366	1598547	4.50164	3.0545e-13	53.1728	18	4	----->	0.0043435
703.0	ingrowing nail	diseases of the skin and subcutaneous tissue	713.5	arthropathy w/neurological disorder	diseases of the musculoskeletal system and connective tissue	24	6110	364	1613782	17.4146	3.9532e-74	331.772	14	10	----->	0.54126
703.8	diseases, nail nec	diseases of the skin and subcutaneous tissue	713.5	arthropathy w/neurological disorder	diseases of the musculoskeletal system and connective tissue	78	4005	310	1615887	101.518	0	6005.57	52	25	----->	0.0027991
704.8	disease, hair nec	diseases of the skin and subcutaneous tissue	713.5	arthropathy w/neurological disorder	diseases of the musculoskeletal system and connective tissue	17	10905	371	1608987	6.76086	6.963e-18	74.227	14	3	----->	0.012726
706.1	acne nec	diseases of the skin and subcutaneous tissue	713.5	arthropathy w/neurological disorder	diseases of the musculoskeletal system and connective tissue	15	34405	373	1585487	1.85321	0.027565	4.85507	11	4	----->	0.11847
706.2	cyst, sebaceous	diseases of the skin and subcutaneous tissue	713.5	arthropathy w/neurological disorder	diseases of the musculoskeletal system and connective tissue	28	30020	360	1589872	4.11914	2.1461e-14	58.3934	22	6	----->	0.0037192
706.8	disease, sebaceous gland nec	diseases of the skin and subcutaneous tissue	713.5	arthropathy w/neurological disorder	diseases of the musculoskeletal system and connective tissue	19	5405	369	1614487	15.3803	1.1923e-51	228.62	12	7	----->	0.35928
707.0	ulcer, pressure	diseases of the skin and subcutaneous tissue	713.5	arthropathy w/neurological disorder	diseases of the musculoskeletal system and connective tissue	54	3382	334	1616510	77.2773	0	3380.47	52	1	----->	1.199e-14
707.00	ulcer, pressure nos	diseases of the skin and subcutaneous tissue	713.5	arthropathy w/neurological disorder	diseases of the musculoskeletal system and connective tissue	13	1094	375	1618798	51.2965	6.1702e-125	565.214	8	5	----->	0.58105
707.1	ulcer, lower limb	diseases of the skin and subcutaneous tissue	713.5	arthropathy w/neurological disorder	diseases of the musculoskeletal system and connective tissue	64	2883	324	1617009	110.791	0	5599.04	61	2	----->	4.3737e-16
707.10	ulcer, lower limb nos	diseases of the skin and subcutaneous tissue	713.5	arthropathy w/neurological disorder	diseases of the musculoskeletal system and connective tissue	59	1559	329	1618333	186.156	0	8726.85	22	35	<-----	0.11116
707.12	ulcer, calf	diseases of the skin and subcutaneous tissue	713.5	arthropathy w/neurological disorder	diseases of the musculoskeletal system and connective tissue	22	635	366	1619257	153.279	0	2897.15	7	15	<-----	0.1338
707.13	ulcer, ankle	diseases of the skin and subcutaneous tissue	713.5	arthropathy w/neurological disorder	diseases of the musculoskeletal system and connective tissue	20	646	368	1619246	136.227	0	2346.94	7	12	<-----	0.35928
707.14	ulcer, heel and midfoot	diseases of the skin and subcutaneous tissue	713.5	arthropathy w/neurological disorder	diseases of the musculoskeletal system and connective tissue	94	949	294	1618943	545.439	0	34846.4	45	44	----->	1
707.15	ulcer, other part of foot	diseases of the skin and subcutaneous tissue	713.5	arthropathy w/neurological disorder	diseases of the musculoskeletal system and connective tissue	126	2022	262	1617870	384.797	0	30417.6	76	48	----->	0.014985
707.19	ulcer, oth prt of lwr limb	diseases of the skin and subcutaneous tissue	713.5	arthropathy w/neurological disorder	diseases of the musculoskeletal system and connective tissue	35	441	353	1619451	364.102	0	10378.8	13	22	<-----	0.17547
707.8	ulcer, chronic, skin nec	diseases of the skin and subcutaneous tissue	713.5	arthropathy w/neurological disorder	diseases of the musculoskeletal system and connective tissue	13	1289	375	1618603	43.5311	9.8065e-106	476.959	6	7	<-----	1
707.9	ulcer, chronic, skin nos	diseases of the skin and subcutaneous tissue	713.5	arthropathy w/neurological disorder	diseases of the musculoskeletal system and connective tissue	62	3782	326	1616110	81.2687	0	3997.26	43	19	----->	0.0031561
709.8	disorders, skin nec	diseases of the skin and subcutaneous tissue	713.5	arthropathy w/neurological disorder	diseases of the musculoskeletal system and connective tissue	59	62745	329	1557147	4.45048	2.8972e-30	130.688	33	26	----->	0.43499
709.9	disorders, skin nos	diseases of the skin and subcutaneous tissue	713.5	arthropathy w/neurological disorder	diseases of the musculoskeletal system and connective tissue	23	24173	365	1595719	4.15969	2.6805e-12	48.9095	17	6	----->	0.03469
710.0	systemic lupus erythematosus	diseases of the musculoskeletal system and connective tissue	713.5	arthropathy w/neurological disorder	diseases of the musculoskeletal system and connective tissue	14	7492	374	1612400	8.05622	2.1302e-18	76.5655	8	6	----->	0.79053
711.00	arthritis, pyogenic, unspec site	diseases of the musculoskeletal system and connective tissue	713.5	arthropathy w/neurological disorder	diseases of the musculoskeletal system and connective tissue	10	1228	378	1618664	34.8712	3.6779e-64	286.012	7	3	----->	0.34375
713.5	arthropathy w/neurological disorder	diseases of the musculoskeletal system and connective tissue	714.0	arthritis, rheumatoid	diseases of the musculoskeletal system and connective tissue	37	351	12538	1607354	13.5138	1.2267e-83	375.436	5	31	<-----	1.2913e-05
713.5	arthropathy w/neurological disorder	diseases of the musculoskeletal system and connective tissue	714.9	polyarthropathy, inflammatory nos	diseases of the musculoskeletal system and connective tissue	17	371	3942	1615950	18.7839	1.4089e-57	255.805	6	11	<-----	0.33231
713.5	arthropathy w/neurological disorder	diseases of the musculoskeletal system and connective tissue	715.90	osteoarthrosis nos, unspc site	diseases of the musculoskeletal system and connective tissue	99	289	31404	1588488	17.3275	2.8927e-245	1118.67	30	69	<-----	0.00011094
713.5	arthropathy w/neurological disorder	diseases of the musculoskeletal system and connective tissue	715.91	osteoarthrosis nos, shoulder	diseases of the musculoskeletal system and connective tissue	16	372	5760	1614132	12.053	2.5859e-33	144.631	7	9	<-----	0.80362
713.5	arthropathy w/neurological disorder	diseases of the musculoskeletal system and connective tissue	715.94	osteoarthrosis nos, hand	diseases of the musculoskeletal system and connective tissue	16	372	4691	1615201	14.8094	6.9914e-42	183.851	6	10	<-----	0.4545
713.5	arthropathy w/neurological disorder	diseases of the musculoskeletal system and connective tissue	715.95	osteoarthrosis nos, pelvis/thigh	diseases of the musculoskeletal system and connective tissue	26	362	10200	1609692	11.3346	1.9989e-49	218.421	8	17	<-----	0.10775
713.5	arthropathy w/neurological disorder	diseases of the musculoskeletal system and connective tissue	715.96	osteoarthrosis nos, lower leg	diseases of the musculoskeletal system and connective tissue	60	328	22707	1597185	12.8669	3.1383e-120	543.58	22	38	<-----	0.051894
713.5	arthropathy w/neurological disorder	diseases of the musculoskeletal system and connective tissue	715.97	osteoarthrosis nos, ankle/foot	diseases of the musculoskeletal system and connective tissue	64	324	2624	1617268	121.746	0	6149.67	29	32	<-----	0.79815
713.5	arthropathy w/neurological disorder	diseases of the musculoskeletal system and connective tissue	715.98	osteoarthrosis nos, other spec site	diseases of the musculoskeletal system and connective tissue	20	368	7052	1612840	12.4297	8.2826e-43	188.095	9	11	<-----	0.8238
713.5	arthropathy w/neurological disorder	diseases of the musculoskeletal system and connective tissue	716.17	arthropathy, traumatic, ankle/foot	diseases of the musculoskeletal system and connective tissue	22	366	427	1619465	227.974	0	4258.52	12	9	----->	0.66362
713.5	arthropathy w/neurological disorder	diseases of the musculoskeletal system and connective tissue	716.40	arthropathy, transient, unspc site	diseases of the musculoskeletal system and connective tissue	10	378	2689	1617203	15.9104	2.9469e-28	121.515	1	9	<-----	0.021484
713.5	arthropathy w/neurological disorder	diseases of the musculoskeletal system and connective tissue	716.90	arthropathy nos, unspecified site	diseases of the musculoskeletal system and connective tissue	47	341	11128	1608764	19.9259	3.224e-159	722.843	15	32	<-----	0.018624
713.5	arthropathy w/neurological disorder	diseases of the musculoskeletal system and connective tissue	716.96	arthropathy nos, lower leg	diseases of the musculoskeletal system and connective tissue	11	377	2702	1617190	17.4633	2.08e-34	149.638	6	5	----->	1
713.5	arthropathy w/neurological disorder	diseases of the musculoskeletal system and connective tissue	716.97	arthropathy nos, ankle/foot	diseases of the musculoskeletal system and connective tissue	32	356	1005	1618887	144.794	0	3936.48	16	16	------	1
713.5	arthropathy w/neurological disorder	diseases of the musculoskeletal system and connective tissue	717.9	derangement, internal, knee nos	diseases of the musculoskeletal system and connective tissue	11	377	4144	1615748	11.3764	1.396e-21	91.0569	2	9	<-----	0.06543
713.5	arthropathy w/neurological disorder	diseases of the musculoskeletal system and connective tissue	718.47	contracture, joint, ankle/foot	diseases of the musculoskeletal system and connective tissue	31	357	1389	1618503	101.182	0	2678.04	15	15	------	1
713.5	arthropathy w/neurological disorder	diseases of the musculoskeletal system and connective tissue	718.87	drngmnt, oth joint nec, ankle/foot	diseases of the musculoskeletal system and connective tissue	17	371	1168	1618724	63.5046	9.807e-204	927.602	7	8	<-----	1
713.5	arthropathy w/neurological disorder	diseases of the musculoskeletal system and connective tissue	719.00	effusion, joint, unspc site	diseases of the musculoskeletal system and connective tissue	10	378	2455	1617437	17.4295	3.8002e-31	134.721	5	5	------	1
713.5	arthropathy w/neurological disorder	diseases of the musculoskeletal system and connective tissue	719.03	effusion, joint, forearm	diseases of the musculoskeletal system and connective tissue	10	378	575	1619317	74.5027	4.1807e-138	625.759	5	5	------	1
713.5	arthropathy w/neurological disorder	diseases of the musculoskeletal system and connective tissue	719.06	effusion, joint, lower leg	diseases of the musculoskeletal system and connective tissue	23	365	8144	1611748	12.4708	4.167e-49	216.959	3	20	<-----	0.00048828
713.5	arthropathy w/neurological disorder	diseases of the musculoskeletal system and connective tissue	719.07	effusion, joint, ankle/foot	diseases of the musculoskeletal system and connective tissue	45	343	3371	1616521	62.9131	0	2338.12	19	25	<-----	0.45138
713.5	arthropathy w/neurological disorder	diseases of the musculoskeletal system and connective tissue	719.40	pain in joint, unspecified site	diseases of the musculoskeletal system and connective tissue	52	336	25994	1593898	9.48968	1.3451e-74	333.921	15	36	<-----	0.0046013
713.5	arthropathy w/neurological disorder	diseases of the musculoskeletal system and connective tissue	719.41	pain in joint, shoulder	diseases of the musculoskeletal system and connective tissue	87	301	49979	1569913	9.07906	5.94e-106	477.959	27	59	<-----	0.00073171
713.5	arthropathy w/neurological disorder	diseases of the musculoskeletal system and connective tissue	719.42	pain in joint, upper arm	diseases of the musculoskeletal system and connective tissue	28	360	15339	1604553	8.13603	9.8239e-36	155.704	8	20	<-----	0.035698
713.5	arthropathy w/neurological disorder	diseases of the musculoskeletal system and connective tissue	719.43	pain in joint, forearm	diseases of the musculoskeletal system and connective tissue	47	341	23392	1596500	9.40687	1.0435e-67	302.292	21	26	<-----	0.56006
713.5	arthropathy w/neurological disorder	diseases of the musculoskeletal system and connective tissue	719.44	pain in joint, hand	diseases of the musculoskeletal system and connective tissue	49	339	24994	1594898	9.22345	1.5899e-68	306.042	17	31	<-----	0.059463
713.5	arthropathy w/neurological disorder	diseases of the musculoskeletal system and connective tissue	719.45	pain in joint, pelvis/thigh	diseases of the musculoskeletal system and connective tissue	93	295	46004	1573888	10.7855	1.2901e-136	618.911	36	57	<-----	0.037514
713.5	arthropathy w/neurological disorder	diseases of the musculoskeletal system and connective tissue	719.46	pain in joint, lower leg	diseases of the musculoskeletal system and connective tissue	140	248	82516	1537376	10.5176	5.7691e-168	763.072	42	98	<-----	2.4915e-06
713.5	arthropathy w/neurological disorder	diseases of the musculoskeletal system and connective tissue	719.47	pain in joint, ankle/foot	diseases of the musculoskeletal system and connective tissue	270	118	51363	1568529	69.8753	0	5524.9	52	188	<-----	2.9116e-19
713.5	arthropathy w/neurological disorder	diseases of the musculoskeletal system and connective tissue	719.48	pain in joint, other spec site	diseases of the musculoskeletal system and connective tissue	14	374	9926	1609966	6.07154	4.8123e-13	52.2801	6	8	<-----	0.79053
713.5	arthropathy w/neurological disorder	diseases of the musculoskeletal system and connective tissue	719.49	pain in joint, multiple sites	diseases of the musculoskeletal system and connective tissue	19	369	6606	1613286	12.5748	2.7838e-41	181.103	7	12	<-----	0.35928
713.5	arthropathy w/neurological disorder	diseases of the musculoskeletal system and connective tissue	719.50	stiffness, joint nec, unspc site	diseases of the musculoskeletal system and connective tissue	12	376	1573	1618319	32.8344	6.4176e-73	326.214	9	3	----->	0.146
713.5	arthropathy w/neurological disorder	diseases of the musculoskeletal system and connective tissue	719.68	symptom, joint nec, oth spec site	diseases of the musculoskeletal system and connective tissue	17	371	3758	1616134	19.7059	1.2766e-60	269.765	4	13	<-----	0.049042
713.5	arthropathy w/neurological disorder	diseases of the musculoskeletal system and connective tissue	719.90	disorder, joint nos, unspc site	diseases of the musculoskeletal system and connective tissue	18	370	872	1619020	90.3247	4.0729e-307	1403.28	12	5	----->	0.14346
713.5	arthropathy w/neurological disorder	diseases of the musculoskeletal system and connective tissue	721.0	spondylosis, cervical	diseases of the musculoskeletal system and connective tissue	20	368	12270	1607622	7.12068	3.3502e-22	93.8814	9	10	<-----	1
713.5	arthropathy w/neurological disorder	diseases of the musculoskeletal system and connective tissue	721.2	spondylosis, thoracic	diseases of the musculoskeletal system and connective tissue	10	378	2206	1617686	19.3998	6.8405e-35	151.848	5	4	----->	1
713.5	arthropathy w/neurological disorder	diseases of the musculoskeletal system and connective tissue	721.3	spondylosis, lumbosacral	diseases of the musculoskeletal system and connective tissue	36	352	13501	1606391	12.1687	2.1606e-72	323.794	20	16	----->	0.61772
713.5	arthropathy w/neurological disorder	diseases of the musculoskeletal system and connective tissue	721.90	spondylosis nos w/o myelopathy	diseases of the musculoskeletal system and connective tissue	14	374	4413	1615479	13.7033	1.0555e-33	146.411	5	9	<-----	0.42395
713.5	arthropathy w/neurological disorder	diseases of the musculoskeletal system and connective tissue	722.0	dsplcmnt, cervical disc w/o myelpy	diseases of the musculoskeletal system and connective tissue	12	376	8052	1611840	6.38869	5.0541e-12	47.6659	3	9	<-----	0.146
713.5	arthropathy w/neurological disorder	diseases of the musculoskeletal system and connective tissue	722.10	dsplcmnt, lumbar disc w/o myelpy	diseases of the musculoskeletal system and connective tissue	20	368	17303	1602589	5.03365	3.4824e-14	57.4412	5	15	<-----	0.041389
713.5	arthropathy w/neurological disorder	diseases of the musculoskeletal system and connective tissue	722.4	degeneration, cervical disc	diseases of the musculoskeletal system and connective tissue	11	377	7366	1612526	6.38743	4.4966e-11	43.3848	3	8	<-----	0.22656
713.5	arthropathy w/neurological disorder	diseases of the musculoskeletal system and connective tissue	722.52	degeneration, lumbar/lmbsac disc	diseases of the musculoskeletal system and connective tissue	33	355	14691	1605201	10.157	3.3197e-54	240.338	9	24	<-----	0.013531
713.5	arthropathy w/neurological disorder	diseases of the musculoskeletal system and connective tissue	722.6	degeneration, disc nos	diseases of the musculoskeletal system and connective tissue	17	371	7227	1612665	10.2249	2.6777e-29	126.274	6	11	<-----	0.33231
713.5	arthropathy w/neurological disorder	diseases of the musculoskeletal system and connective tissue	723.1	cervicalgia	diseases of the musculoskeletal system and connective tissue	61	327	56601	1563291	5.15226	1.7831e-38	168.251	21	40	<-----	0.020415
713.5	arthropathy w/neurological disorder	diseases of the musculoskeletal system and connective tissue	723.4	neuritis, brachial nos	diseases of the musculoskeletal system and connective tissue	11	377	8335	1611557	5.64146	1.6413e-09	36.3589	3	8	<-----	0.22656
713.5	arthropathy w/neurological disorder	diseases of the musculoskeletal system and connective tissue	724.00	stenosis, spinal, unspec region	diseases of the musculoskeletal system and connective tissue	14	374	4849	1615043	12.4678	2.3641e-30	131.092	5	9	<-----	0.42395
713.5	arthropathy w/neurological disorder	diseases of the musculoskeletal system and connective tissue	724.02	stenosis, spinal, lmbr, no neuro cl	diseases of the musculoskeletal system and connective tissue	28	360	9692	1610200	12.9218	1.5696e-61	273.942	9	18	<-----	0.12208
713.5	arthropathy w/neurological disorder	diseases of the musculoskeletal system and connective tissue	724.1	pain in thoracic spine	diseases of the musculoskeletal system and connective tissue	41	347	14455	1605437	13.1229	1.0821e-88	398.652	17	24	<-----	0.34889
713.5	arthropathy w/neurological disorder	diseases of the musculoskeletal system and connective tissue	724.2	lumbago	diseases of the musculoskeletal system and connective tissue	117	271	98657	1521235	6.6571	2.0247e-86	388.215	24	93	<-----	8.8895e-11
713.5	arthropathy w/neurological disorder	diseases of the musculoskeletal system and connective tissue	724.3	sciatica	diseases of the musculoskeletal system and connective tissue	30	358	15771	1604121	8.52346	2.7573e-40	176.542	6	24	<-----	0.0014309
713.5	arthropathy w/neurological disorder	diseases of the musculoskeletal system and connective tissue	724.4	neuritis, lumbosacral nos	diseases of the musculoskeletal system and connective tissue	26	362	16574	1603318	6.94796	1.9276e-27	117.79	7	19	<-----	0.028959
713.5	arthropathy w/neurological disorder	diseases of the musculoskeletal system and connective tissue	724.5	backache nos	diseases of the musculoskeletal system and connective tissue	87	301	60426	1559466	7.45942	7.5536e-83	371.81	18	69	<-----	3.3216e-08
713.5	arthropathy w/neurological disorder	diseases of the musculoskeletal system and connective tissue	724.6	disorders, sacrum	diseases of the musculoskeletal system and connective tissue	10	378	6588	1613304	6.47845	2.7109e-10	39.8725	6	4	----->	0.75391
713.5	arthropathy w/neurological disorder	diseases of the musculoskeletal system and connective tissue	724.9	disorder, back nos	diseases of the musculoskeletal system and connective tissue	32	356	19348	1600544	7.43587	4.2509e-36	157.369	10	21	<-----	0.070756
713.5	arthropathy w/neurological disorder	diseases of the musculoskeletal system and connective tissue	726.10	syndrome, rotator cuff nos	diseases of the musculoskeletal system and connective tissue	36	352	17763	1602129	9.22446	2.7526e-52	231.539	17	18	<-----	1
713.5	arthropathy w/neurological disorder	diseases of the musculoskeletal system and connective tissue	726.33	bursitis, olecranon	diseases of the musculoskeletal system and connective tissue	17	371	2029	1617863	36.5372	5.8457e-116	523.952	10	7	----->	0.62906
713.5	arthropathy w/neurological disorder	diseases of the musculoskeletal system and connective tissue	726.5	enthesopathy, hip	diseases of the musculoskeletal system and connective tissue	13	375	5739	1614153	9.75036	2.1997e-21	90.1572	4	9	<-----	0.26685
713.5	arthropathy w/neurological disorder	diseases of the musculoskeletal system and connective tissue	726.70	enthesopathy, ankle nos	diseases of the musculoskeletal system and connective tissue	14	374	2370	1617522	25.5481	9.4279e-66	293.314	5	6	<-----	1
713.5	arthropathy w/neurological disorder	diseases of the musculoskeletal system and connective tissue	726.79	enthesopathy, ankle nec	diseases of the musculoskeletal system and connective tissue	13	375	835	1619057	67.2183	4.3815e-164	745.225	7	5	----->	0.77441
713.5	arthropathy w/neurological disorder	diseases of the musculoskeletal system and connective tissue	726.90	enthesopathy, site nos	diseases of the musculoskeletal system and connective tissue	34	354	25122	1594770	6.09705	1.5747e-29	127.328	7	27	<-----	0.0008214
713.5	arthropathy w/neurological disorder	diseases of the musculoskeletal system and connective tissue	726.91	exostosis, site nos	diseases of the musculoskeletal system and connective tissue	19	369	2136	1617756	38.9977	1.5686e-138	627.716	10	9	----->	1
713.5	arthropathy w/neurological disorder	diseases of the musculoskeletal system and connective tissue	727.00	synovitis nos	diseases of the musculoskeletal system and connective tissue	11	377	3679	1616213	12.818	1.2731e-24	104.918	6	5	----->	1
713.5	arthropathy w/neurological disorder	diseases of the musculoskeletal system and connective tissue	727.06	tenosynovitis, foot/ankle	diseases of the musculoskeletal system and connective tissue	12	376	928	1618964	55.6779	6.1747e-125	565.213	6	6	------	1
713.5	arthropathy w/neurological disorder	diseases of the musculoskeletal system and connective tissue	727.1	bunion	diseases of the musculoskeletal system and connective tissue	14	374	2638	1617254	22.9488	9.8533e-59	261.105	5	9	<-----	0.42395
713.5	arthropathy w/neurological disorder	diseases of the musculoskeletal system and connective tissue	727.3	bursitis nos	diseases of the musculoskeletal system and connective tissue	21	367	4600	1615292	20.0931	3.9853e-76	340.939	8	13	<-----	0.38331
713.5	arthropathy w/neurological disorder	diseases of the musculoskeletal system and connective tissue	727.51	cyst, popliteal synovial	diseases of the musculoskeletal system and connective tissue	10	378	2739	1617153	15.6195	1.0544e-27	118.987	5	5	------	1
713.5	arthropathy w/neurological disorder	diseases of the musculoskeletal system and connective tissue	727.61	rupture, rotator cuff	diseases of the musculoskeletal system and connective tissue	13	375	6255	1613637	8.94315	2.335e-19	80.933	4	9	<-----	0.26685
713.5	arthropathy w/neurological disorder	diseases of the musculoskeletal system and connective tissue	727.81	disorder, contracture, tendon	diseases of the musculoskeletal system and connective tissue	13	375	2503	1617389	22.4009	4.0344e-53	235.363	7	6	----->	1
713.5	arthropathy w/neurological disorder	diseases of the musculoskeletal system and connective tissue	728.3	disorder, muscle nec	diseases of the musculoskeletal system and connective tissue	10	378	3051	1616841	14.0195	1.1727e-24	105.08	3	7	<-----	0.34375
713.5	arthropathy w/neurological disorder	diseases of the musculoskeletal system and connective tissue	728.71	fibromatosis, plantar fascial	diseases of the musculoskeletal system and connective tissue	20	368	11423	1608469	7.6527	2.9371e-24	103.261	6	12	<-----	0.23788
713.5	arthropathy w/neurological disorder	diseases of the musculoskeletal system and connective tissue	728.87	weakness, muscle	diseases of the musculoskeletal system and connective tissue	14	374	4965	1614927	12.1756	1.4654e-29	127.471	7	7	------	1
713.5	arthropathy w/neurological disorder	diseases of the musculoskeletal system and connective tissue	729.1	myalgia/myositis nos	diseases of the musculoskeletal system and connective tissue	55	333	28896	1590996	9.09389	2.9022e-74	332.388	14	41	<-----	0.00035528
713.5	arthropathy w/neurological disorder	diseases of the musculoskeletal system and connective tissue	729.2	neuralgia/neuritis nos	diseases of the musculoskeletal system and connective tissue	23	365	11149	1608743	9.09255	4.836e-34	147.962	5	18	<-----	0.010622
713.5	arthropathy w/neurological disorder	diseases of the musculoskeletal system and connective tissue	729.5	pain in limb	diseases of the musculoskeletal system and connective tissue	281	107	110082	1509810	36.0187	0	2621.74	66	205	<-----	9.4226e-18
713.5	arthropathy w/neurological disorder	diseases of the musculoskeletal system and connective tissue	729.81	swelling, limb	diseases of the musculoskeletal system and connective tissue	139	249	26717	1593175	33.2883	0	2758.55	49	90	<-----	0.0006383
713.5	arthropathy w/neurological disorder	diseases of the musculoskeletal system and connective tissue	729.89	symptom, musculoskeletal, limb nec	diseases of the musculoskeletal system and connective tissue	10	378	4081	1615811	10.4745	6.6774e-18	74.3097	5	5	------	1
713.5	arthropathy w/neurological disorder	diseases of the musculoskeletal system and connective tissue	730.00	osteomyelitis, acute, unspc site	diseases of the musculoskeletal system and connective tissue	20	368	597	1619295	147.412	0	2536.33	10	9	----->	1
713.5	arthropathy w/neurological disorder	diseases of the musculoskeletal system and connective tissue	730.07	osteomyelitis, acute, ankle/foot	diseases of the musculoskeletal system and connective tissue	36	352	613	1619279	270.16	0	8043.36	12	22	<-----	0.12145
713.5	arthropathy w/neurological disorder	diseases of the musculoskeletal system and connective tissue	730.10	osteomyelitis, chronic, unspc site	diseases of the musculoskeletal system and connective tissue	16	372	627	1619265	111.078	0	1530.44	10	6	----->	0.4545
713.5	arthropathy w/neurological disorder	diseases of the musculoskeletal system and connective tissue	730.17	osteomyelitis, chronic, ankle/foot	diseases of the musculoskeletal system and connective tissue	27	361	242	1619650	500.567	0	10853.3	12	14	<-----	0.84502
713.5	arthropathy w/neurological disorder	diseases of the musculoskeletal system and connective tissue	730.20	osteomyelitis nos, unspc site	diseases of the musculoskeletal system and connective tissue	92	296	4542	1615350	110.539	0	7385.74	35	57	<-----	0.028017
713.5	arthropathy w/neurological disorder	diseases of the musculoskeletal system and connective tissue	730.21	osteomyelitis nos, shoulder	diseases of the musculoskeletal system and connective tissue	20	368	550	1619342	160.014	0	2748.58	5	15	<-----	0.041389
713.5	arthropathy w/neurological disorder	diseases of the musculoskeletal system and connective tissue	730.26	osteomyelitis nos, lower leg	diseases of the musculoskeletal system and connective tissue	30	358	818	1619074	165.864	0	4229.98	15	15	------	1
713.5	arthropathy w/neurological disorder	diseases of the musculoskeletal system and connective tissue	730.27	osteomyelitis nos, ankle/foot	diseases of the musculoskeletal system and connective tissue	101	287	1542	1618350	369.341	0	25503	39	59	<-----	0.054391
713.5	arthropathy w/neurological disorder	diseases of the musculoskeletal system and connective tissue	730.28	osteomyelitis nos, oth spec site	diseases of the musculoskeletal system and connective tissue	65	323	2474	1617418	131.563	0	6726.26	31	33	<-----	0.90065
713.5	arthropathy w/neurological disorder	diseases of the musculoskeletal system and connective tissue	731.8	inv, bone, other in diseases ce	diseases of the musculoskeletal system and connective tissue	19	369	105	1619787	794.321	0	11492.7	12	7	----->	0.35928
713.5	arthropathy w/neurological disorder	diseases of the musculoskeletal system and connective tissue	733.00	osteoporosis nos	diseases of the musculoskeletal system and connective tissue	44	344	16932	1602960	12.109	4.3527e-86	386.689	18	26	<-----	0.29122
713.5	arthropathy w/neurological disorder	diseases of the musculoskeletal system and connective tissue	733.82	nonunion, fracture	diseases of the musculoskeletal system and connective tissue	33	355	3689	1616203	40.7261	2.1922e-246	1123.82	16	15	----->	1
713.5	arthropathy w/neurological disorder	diseases of the musculoskeletal system and connective tissue	733.90	disorder, bone/cartilage nos	diseases of the musculoskeletal system and connective tissue	233	155	88695	1531197	25.9511	0	2216.9	59	160	<-----	5.9057e-12
713.5	arthropathy w/neurological disorder	diseases of the musculoskeletal system and connective tissue	733.99	disorder, bone/cartilage nec	diseases of the musculoskeletal system and connective tissue	37	351	9180	1610712	18.4957	1.4047e-118	535.991	12	25	<-----	0.047031
713.5	arthropathy w/neurological disorder	diseases of the musculoskeletal system and connective tissue	734	flat foot	diseases of the musculoskeletal system and connective tissue	28	360	4575	1615317	27.4614	6.2619e-140	634.148	15	12	----->	0.70111
713.5	arthropathy w/neurological disorder	diseases of the musculoskeletal system and connective tissue	735.0	hallux valgus, acquired	diseases of the musculoskeletal system and connective tissue	19	369	1567	1618325	53.177	2.9709e-190	865.587	8	7	----->	1
713.5	arthropathy w/neurological disorder	diseases of the musculoskeletal system and connective tissue	735.2	hallux rigidus, acquired	diseases of the musculoskeletal system and connective tissue	15	373	704	1619188	92.4926	1.9009e-261	1193.13	8	6	----->	0.79053
713.5	arthropathy w/neurological disorder	diseases of the musculoskeletal system and connective tissue	735.4	hammer toe, other, acquired	diseases of the musculoskeletal system and connective tissue	23	365	1491	1618401	68.398	2.9385e-296	1353.31	6	15	<-----	0.078354
713.5	arthropathy w/neurological disorder	diseases of the musculoskeletal system and connective tissue	736.70	deformity, acquired, ankle/foot nos	diseases of the musculoskeletal system and connective tissue	38	350	1802	1618090	97.4908	0	3121.29	22	15	----->	0.32401
713.5	arthropathy w/neurological disorder	diseases of the musculoskeletal system and connective tissue	736.72	deformity, acquired equinus, foot	diseases of the musculoskeletal system and connective tissue	19	369	217	1619675	384.322	0	6021.43	11	6	----->	0.33231
713.5	arthropathy w/neurological disorder	diseases of the musculoskeletal system and connective tissue	736.75	deformity, cavovarus, acquired	diseases of the musculoskeletal system and connective tissue	16	372	193	1619699	360.956	0	4771.19	10	6	----->	0.4545
713.5	arthropathy w/neurological disorder	diseases of the musculoskeletal system and connective tissue	736.79	deformity, acquired, ankle/foot nec	diseases of the musculoskeletal system and connective tissue	44	344	2120	1617772	97.6058	0	3570.71	17	24	<-----	0.34889
713.5	arthropathy w/neurological disorder	diseases of the musculoskeletal system and connective tissue	737.30	scoliosis, idiopathic	diseases of the musculoskeletal system and connective tissue	13	375	11122	1608770	5.01445	1.5073e-09	36.5249	5	8	<-----	0.58105
713.5	arthropathy w/neurological disorder	diseases of the musculoskeletal system and connective tissue	756.9	anom cngn, musculoskeletal nec/nos	congenital anomalies	20	368	1799	1618093	48.8826	1.0149e-183	835.535	8	9	<-----	1
713.5	arthropathy w/neurological disorder	diseases of the musculoskeletal system and connective tissue	780.02	symp alteration of aware, transient	symptoms, signs, and ill-defined conditions	12	376	3348	1616544	15.4097	7.556e-33	142.501	7	5	----->	0.77441
713.5	arthropathy w/neurological disorder	diseases of the musculoskeletal system and connective tissue	780.09	symp alteration, consciousness nec	symptoms, signs, and ill-defined conditions	37	351	12793	1607099	13.2423	9.832e-82	366.691	19	18	----->	1
713.5	arthropathy w/neurological disorder	diseases of the musculoskeletal system and connective tissue	780.2	symptom, syncope and collapse	symptoms, signs, and ill-defined conditions	58	330	36371	1583521	7.65214	1.1976e-62	279.07	17	41	<-----	0.0022326
713.5	arthropathy w/neurological disorder	diseases of the musculoskeletal system and connective tissue	780.39	symptom, convulsions nos	symptoms, signs, and ill-defined conditions	23	365	25899	1593993	3.87827	4.3075e-11	43.4689	11	12	<-----	1
713.5	arthropathy w/neurological disorder	diseases of the musculoskeletal system and connective tissue	780.4	symptom, dizziness and giddiness	symptoms, signs, and ill-defined conditions	72	316	56603	1563289	6.29282	1.1098e-57	256.281	25	47	<-----	0.012775
713.5	arthropathy w/neurological disorder	diseases of the musculoskeletal system and connective tissue	780.50	symptom, disturbance, sleep nos	symptoms, signs, and ill-defined conditions	21	367	12319	1607573	7.46704	1.2236e-24	104.996	10	11	<-----	1
713.5	arthropathy w/neurological disorder	diseases of the musculoskeletal system and connective tissue	780.52	symptom, insomnia nos	symptoms, signs, and ill-defined conditions	26	362	20099	1599793	5.71681	2.5239e-21	89.8851	12	14	<-----	0.84502
713.5	arthropathy w/neurological disorder	diseases of the musculoskeletal system and connective tissue	780.53	symp hypersomnia w/sleep apnea nos	symptoms, signs, and ill-defined conditions	40	348	18246	1601646	10.0897	6.1801e-64	284.977	13	27	<-----	0.038477
713.5	arthropathy w/neurological disorder	diseases of the musculoskeletal system and connective tissue	780.56	symptom, dysfunctions, sleep stage	symptoms, signs, and ill-defined conditions	11	377	2825	1617067	16.7017	8.3441e-33	142.304	2	9	<-----	0.06543
713.5	arthropathy w/neurological disorder	diseases of the musculoskeletal system and connective tissue	780.57	symptom, apnea, sleep nos	symptoms, signs, and ill-defined conditions	51	337	20590	1599302	11.7548	1.6166e-94	425.416	14	37	<-----	0.0017692
713.5	arthropathy w/neurological disorder	diseases of the musculoskeletal system and connective tissue	780.6	fever othr physi disturb temp regul	symptoms, signs, and ill-defined conditions	134	254	93423	1526469	8.61996	3.3691e-129	584.811	43	91	<-----	4.1113e-05
713.5	arthropathy w/neurological disorder	diseases of the musculoskeletal system and connective tissue	780.60	symptom, fever, unspecified	symptoms, signs, and ill-defined conditions	19	369	6894	1612998	12.0473	2.4768e-39	172.176	15	4	----->	0.019211
713.5	arthropathy w/neurological disorder	diseases of the musculoskeletal system and connective tissue	780.7	symptom, malaise and fatigue	symptoms, signs, and ill-defined conditions	24	364	18811	1601081	5.61192	2.3606e-19	80.9115	1	23	<-----	2.9802e-06
713.5	arthropathy w/neurological disorder	diseases of the musculoskeletal system and connective tissue	780.79	symptom, malaise and fatigue nec	symptoms, signs, and ill-defined conditions	94	294	54916	1564976	9.11149	2.6309e-112	507.16	33	61	<-----	0.0050784
713.5	arthropathy w/neurological disorder	diseases of the musculoskeletal system and connective tissue	780.9	symptom, general nec	symptoms, signs, and ill-defined conditions	30	358	16356	1603536	8.21561	1.6125e-38	168.451	4	25	<-----	0.00010372
713.5	arthropathy w/neurological disorder	diseases of the musculoskeletal system and connective tissue	780.97	status, mental, altered	symptoms, signs, and ill-defined conditions	33	355	6712	1613180	22.3417	5.1117e-131	593.174	22	11	----->	0.080143
713.5	arthropathy w/neurological disorder	diseases of the musculoskeletal system and connective tissue	780.99	symptoms general nec	symptoms, signs, and ill-defined conditions	21	367	8000	1611892	11.5292	3.4899e-41	180.653	12	9	----->	0.66362
713.5	arthropathy w/neurological disorder	diseases of the musculoskeletal system and connective tissue	781.0	symp abnrm involuntary movement nec	symptoms, signs, and ill-defined conditions	39	349	16135	1603757	11.1073	5.4348e-70	312.773	17	21	<-----	0.6271
713.5	arthropathy w/neurological disorder	diseases of the musculoskeletal system and connective tissue	781.2	symptom, abnormality, gait	symptoms, signs, and ill-defined conditions	138	250	23145	1596747	38.0818	0	3167.82	51	81	<-----	0.011315
713.5	arthropathy w/neurological disorder	diseases of the musculoskeletal system and connective tissue	781.3	symptom, lack of coordination	symptoms, signs, and ill-defined conditions	19	369	5441	1614451	15.2782	2.8422e-51	226.89	8	10	<-----	0.81453
713.5	arthropathy w/neurological disorder	diseases of the musculoskeletal system and connective tissue	782.0	symp disturbance of skin sensation	symptoms, signs, and ill-defined conditions	66	322	29422	1590470	11.08	3.6597e-109	492.713	27	39	<-----	0.17529
713.5	arthropathy w/neurological disorder	diseases of the musculoskeletal system and connective tissue	782.1	symp, rash oth nonspc skin erupt	symptoms, signs, and ill-defined conditions	59	329	70635	1549257	3.93332	5.0047e-25	106.768	26	33	<-----	0.43499
713.5	arthropathy w/neurological disorder	diseases of the musculoskeletal system and connective tissue	782.2	symp swell/mass/lump, lclzd, sprfc	symptoms, signs, and ill-defined conditions	18	370	9199	1610693	8.5181	5.4675e-25	106.593	12	5	----->	0.14346
713.5	arthropathy w/neurological disorder	diseases of the musculoskeletal system and connective tissue	782.3	symptom, edema	symptoms, signs, and ill-defined conditions	147	241	38002	1581890	25.3904	0	2115.81	43	101	<-----	1.4874e-06
713.5	arthropathy w/neurological disorder	diseases of the musculoskeletal system and connective tissue	783.1	symptom, abnormal weight gain	symptoms, signs, and ill-defined conditions	10	378	10251	1609641	4.15404	6.5504e-06	20.3202	4	6	<-----	0.75391
713.5	arthropathy w/neurological disorder	diseases of the musculoskeletal system and connective tissue	783.2	symp abnrm loss weight&underweight	symptoms, signs, and ill-defined conditions	11	377	8380	1611512	5.61101	1.9004e-09	36.0733	3	8	<-----	0.22656
713.5	arthropathy w/neurological disorder	diseases of the musculoskeletal system and connective tissue	783.21	symptom, abnormal loss of weight	symptoms, signs, and ill-defined conditions	17	371	16421	1603471	4.47442	1.9456e-10	40.5206	9	8	----->	1
713.5	arthropathy w/neurological disorder	diseases of the musculoskeletal system and connective tissue	783.3	symptom, feeding problem	symptoms, signs, and ill-defined conditions	39	349	30217	1589675	5.8789	9.7295e-32	137.426	14	25	<-----	0.10813
713.5	arthropathy w/neurological disorder	diseases of the musculoskeletal system and connective tissue	784.0	symptom, headache	symptoms, signs, and ill-defined conditions	66	322	82990	1536902	3.79585	8.5225e-26	110.277	23	43	<-----	0.018657
713.5	arthropathy w/neurological disorder	diseases of the musculoskeletal system and connective tissue	784.2	symptom, swelling in head/neck	symptoms, signs, and ill-defined conditions	29	359	29256	1590636	4.39197	2.626e-16	67.0658	10	19	<-----	0.13605
713.5	arthropathy w/neurological disorder	diseases of the musculoskeletal system and connective tissue	784.5	symptom, disturbance, speech nec	symptoms, signs, and ill-defined conditions	15	373	5632	1614260	11.5264	9.5974e-30	128.311	5	10	<-----	0.30176
713.5	arthropathy w/neurological disorder	diseases of the musculoskeletal system and connective tissue	784.7	symptom, epistaxis	symptoms, signs, and ill-defined conditions	11	377	9936	1609956	4.72774	1.3143e-07	27.845	5	6	<-----	1
713.5	arthropathy w/neurological disorder	diseases of the musculoskeletal system and connective tissue	785.0	symptom, tachycardia nos	symptoms, signs, and ill-defined conditions	25	363	14784	1605108	7.47732	5.1351e-29	124.982	14	11	----->	0.69004
713.5	arthropathy w/neurological disorder	diseases of the musculoskeletal system and connective tissue	785.1	symptom, palpitations	symptoms, signs, and ill-defined conditions	31	357	30153	1589739	4.57814	2.3527e-18	76.3694	9	22	<-----	0.029449
713.5	arthropathy w/neurological disorder	diseases of the musculoskeletal system and connective tissue	785.2	symp murmur, cardiac, undiagnosed	symptoms, signs, and ill-defined conditions	29	359	32399	1587493	3.95807	5.5951e-14	56.5087	9	20	<-----	0.061428
713.5	arthropathy w/neurological disorder	diseases of the musculoskeletal system and connective tissue	785.4	symptom, gangrene	symptoms, signs, and ill-defined conditions	32	356	2109	1617783	68.9515	0	1875.8	14	18	<-----	0.59661
713.5	arthropathy w/neurological disorder	diseases of the musculoskeletal system and connective tissue	785.6	symptom, enlargement, lymph nodes	symptoms, signs, and ill-defined conditions	31	357	30074	1589818	4.59039	1.9996e-18	76.6906	12	18	<-----	0.36159
713.5	arthropathy w/neurological disorder	diseases of the musculoskeletal system and connective tissue	785.9	symp inv cardiovascular system nec	symptoms, signs, and ill-defined conditions	61	327	17988	1601904	16.6125	1.2126e-162	738.593	17	42	<-----	0.0015472
713.5	arthropathy w/neurological disorder	diseases of the musculoskeletal system and connective tissue	786.00	symp abnormality, respiratory nos	symptoms, signs, and ill-defined conditions	118	270	52402	1567490	13.073	8.5206e-199	904.882	59	58	----->	1
713.5	arthropathy w/neurological disorder	diseases of the musculoskeletal system and connective tissue	786.05	symptom, shortness of breath	symptoms, signs, and ill-defined conditions	122	266	60502	1559390	11.8212	3.5572e-180	819.23	53	69	<-----	0.17421
713.5	arthropathy w/neurological disorder	diseases of the musculoskeletal system and connective tissue	786.07	symptom, wheezing	symptoms, signs, and ill-defined conditions	17	371	13483	1606409	5.4594	1.256e-13	54.919	8	8	------	1
713.5	arthropathy w/neurological disorder	diseases of the musculoskeletal system and connective tissue	786.09	symp abnormality, respiratory nec	symptoms, signs, and ill-defined conditions	148	240	112852	1507040	8.23505	2.2744e-127	576.401	41	107	<-----	5.5645e-08
713.5	arthropathy w/neurological disorder	diseases of the musculoskeletal system and connective tissue	786.1	symptom, stridor	symptoms, signs, and ill-defined conditions	44	344	15688	1604204	13.0794	4.75e-94	423.265	23	20	----->	0.76079
713.5	arthropathy w/neurological disorder	diseases of the musculoskeletal system and connective tissue	786.2	symptom, cough	symptoms, signs, and ill-defined conditions	143	245	105175	1514717	8.40599	6.6953e-129	583.44	46	96	<-----	3.2939e-05
713.5	arthropathy w/neurological disorder	diseases of the musculoskeletal system and connective tissue	786.50	symptom, pain, chest nos	symptoms, signs, and ill-defined conditions	199	189	143667	1476225	10.819	1.7024e-188	857.5	59	140	<-----	8.9368e-09
713.5	arthropathy w/neurological disorder	diseases of the musculoskeletal system and connective tissue	786.51	symptom, pain, precordial	symptoms, signs, and ill-defined conditions	61	327	25963	1593929	11.4524	1.7413e-106	480.408	14	47	<-----	2.7192e-05
713.5	arthropathy w/neurological disorder	diseases of the musculoskeletal system and connective tissue	786.52	symptom, painful respiration	symptoms, signs, and ill-defined conditions	24	364	18053	1601839	5.85032	1.9091e-20	85.8829	11	13	<-----	0.83882
713.5	arthropathy w/neurological disorder	diseases of the musculoskeletal system and connective tissue	786.59	symptom, pain, chest nec	symptoms, signs, and ill-defined conditions	63	325	34095	1585797	9.016	3.7865e-82	368.594	23	40	<-----	0.042957
713.5	arthropathy w/neurological disorder	diseases of the musculoskeletal system and connective tissue	786.7	symptom, abnormal chest sounds	symptoms, signs, and ill-defined conditions	11	377	4594	1615298	10.2592	3.17e-19	80.3289	11	0	----->	0.00097656
713.5	arthropathy w/neurological disorder	diseases of the musculoskeletal system and connective tissue	786.9	symp inv respiratory syst/chest nec	symptoms, signs, and ill-defined conditions	44	344	11632	1608260	17.6846	7.4742e-132	597.013	36	7	----->	8.963e-06
713.5	arthropathy w/neurological disorder	diseases of the musculoskeletal system and connective tissue	787.01	symptom, nausea with vomiting	symptoms, signs, and ill-defined conditions	87	301	42392	1577500	10.7557	5.9015e-130	588.29	37	50	<-----	0.19798
713.5	arthropathy w/neurological disorder	diseases of the musculoskeletal system and connective tissue	787.02	symptom, nausea alone	symptoms, signs, and ill-defined conditions	48	340	19555	1600337	11.5536	6.0687e-88	395.213	14	34	<-----	0.0055152
713.5	arthropathy w/neurological disorder	diseases of the musculoskeletal system and connective tissue	787.03	symptom, vomiting alone	symptoms, signs, and ill-defined conditions	40	348	27573	1592319	6.63784	4.4147e-38	166.448	15	25	<-----	0.15386
713.5	arthropathy w/neurological disorder	diseases of the musculoskeletal system and connective tissue	787.2	symptom, dysphagia	symptoms, signs, and ill-defined conditions	35	353	23286	1596606	6.79824	6.5315e-35	151.94	7	28	<-----	0.00050826
713.5	arthropathy w/neurological disorder	diseases of the musculoskeletal system and connective tissue	787.3	symp flatulence/eructation/gas pain	symptoms, signs, and ill-defined conditions	19	369	15128	1604764	5.46207	4.2628e-15	61.5746	10	9	----->	1
713.5	arthropathy w/neurological disorder	diseases of the musculoskeletal system and connective tissue	787.91	symptom, diarrhea nos	symptoms, signs, and ill-defined conditions	75	313	49699	1570193	7.57046	1.0155e-75	339.073	30	45	<-----	0.10534
713.5	arthropathy w/neurological disorder	diseases of the musculoskeletal system and connective tissue	788.1	symptom, dysuria	symptoms, signs, and ill-defined conditions	13	375	14825	1605067	3.75328	1.8532e-06	22.7415	9	4	----->	0.26685
713.5	arthropathy w/neurological disorder	diseases of the musculoskeletal system and connective tissue	788.20	symptom, retention, urine nos	symptoms, signs, and ill-defined conditions	29	359	7827	1612065	16.6376	2.5471e-84	378.571	15	14	----->	1
713.5	arthropathy w/neurological disorder	diseases of the musculoskeletal system and connective tissue	788.30	symptom, incontinence, urinary nos	symptoms, signs, and ill-defined conditions	31	357	20613	1599279	6.73715	5.8728e-31	133.857	16	15	----->	1
713.5	arthropathy w/neurological disorder	diseases of the musculoskeletal system and connective tissue	788.41	symptom, frequency, urinary	symptoms, signs, and ill-defined conditions	17	371	12517	1607375	5.88426	5.168e-15	61.1955	7	10	<-----	0.62906
713.5	arthropathy w/neurological disorder	diseases of the musculoskeletal system and connective tissue	788.69	symptom, abnormality, urination nec	symptoms, signs, and ill-defined conditions	15	373	4008	1615884	16.2131	2.2057e-43	190.727	10	5	----->	0.30176
713.5	arthropathy w/neurological disorder	diseases of the musculoskeletal system and connective tissue	788.9	symptoms inv urinary system nec	symptoms, signs, and ill-defined conditions	16	372	11387	1608505	6.07561	8.7806e-15	60.152	5	11	<-----	0.21011
713.5	arthropathy w/neurological disorder	diseases of the musculoskeletal system and connective tissue	789.0	symptom, pain, abdominal	symptoms, signs, and ill-defined conditions	27	361	23393	1596499	5.10434	6.2566e-19	78.9856	0	27	<-----	1.4901e-08
713.5	arthropathy w/neurological disorder	diseases of the musculoskeletal system and connective tissue	789.00	symptom, pain, abdominal, site nos	symptoms, signs, and ill-defined conditions	132	256	120407	1499485	6.42132	9.2711e-88	394.367	47	85	<-----	0.0011951
713.5	arthropathy w/neurological disorder	diseases of the musculoskeletal system and connective tissue	789.01	symp pain, abdominal, right up quad	symptoms, signs, and ill-defined conditions	45	343	25687	1594205	8.14234	1.1559e-54	242.439	20	23	<-----	0.76079
713.5	arthropathy w/neurological disorder	diseases of the musculoskeletal system and connective tissue	789.02	symp, pain, abdominal, left up quad	symptoms, signs, and ill-defined conditions	17	371	8953	1610939	8.2449	9.149e-23	96.4508	8	9	<-----	1
713.5	arthropathy w/neurological disorder	diseases of the musculoskeletal system and connective tissue	789.03	symp pain abdominal right lwr quad	symptoms, signs, and ill-defined conditions	30	358	23954	1595938	5.58311	1.7139e-23	99.7674	11	19	<-----	0.20049
713.5	arthropathy w/neurological disorder	diseases of the musculoskeletal system and connective tissue	789.04	symp pain, abdominal, left lwr quad	symptoms, signs, and ill-defined conditions	30	358	18867	1601025	7.11105	3.4267e-32	139.499	14	16	<-----	0.85554
713.5	arthropathy w/neurological disorder	diseases of the musculoskeletal system and connective tissue	789.06	symp pain, abdominal, epigastric	symptoms, signs, and ill-defined conditions	37	351	31015	1588877	5.40024	5.1295e-27	115.849	14	23	<-----	0.18774
713.5	arthropathy w/neurological disorder	diseases of the musculoskeletal system and connective tissue	789.07	symp pain, abdominal, generalized	symptoms, signs, and ill-defined conditions	89	299	56520	1563372	8.2334	2.1576e-95	429.434	36	52	<-----	0.1093
713.5	arthropathy w/neurological disorder	diseases of the musculoskeletal system and connective tissue	789.09	symp pain, abdominal, site nec	symptoms, signs, and ill-defined conditions	62	326	38901	1580991	7.72935	5.5407e-67	298.964	33	28	----->	0.60892
713.5	arthropathy w/neurological disorder	diseases of the musculoskeletal system and connective tissue	789.30	symp swelling abdmn/pelvic site nos	symptoms, signs, and ill-defined conditions	15	373	14226	1605666	4.53894	1.6139e-09	36.3917	7	8	<-----	1
713.5	arthropathy w/neurological disorder	diseases of the musculoskeletal system and connective tissue	789.5	symptom, ascites	symptoms, signs, and ill-defined conditions	23	365	14541	1605351	6.95682	1.4861e-24	104.611	10	13	<-----	0.67764
713.5	arthropathy w/neurological disorder	diseases of the musculoskeletal system and connective tissue	789.9	symptom inv abdomen/pelvis nec	symptoms, signs, and ill-defined conditions	23	365	11522	1608370	8.79616	1.0089e-32	141.927	15	8	----->	0.21004
713.5	arthropathy w/neurological disorder	diseases of the musculoskeletal system and connective tissue	790.4	elevation, transaminase/ldh levels	symptoms, signs, and ill-defined conditions	17	371	7381	1612511	10.0107	1.3661e-28	123.041	7	10	<-----	0.62906
713.5	arthropathy w/neurological disorder	diseases of the musculoskeletal system and connective tissue	790.5	abnormal serum enzyme level nec	symptoms, signs, and ill-defined conditions	15	373	5714	1614178	11.3604	2.9191e-29	126.103	9	6	----->	0.60724
713.5	arthropathy w/neurological disorder	diseases of the musculoskeletal system and connective tissue	790.6	abnormal blood chemistry nec	symptoms, signs, and ill-defined conditions	50	338	9859	1610033	24.1577	7.3691e-207	941.974	18	32	<-----	0.064909
713.5	arthropathy w/neurological disorder	diseases of the musculoskeletal system and connective tissue	790.7	bacteremia	symptoms, signs, and ill-defined conditions	50	338	8184	1611708	29.1323	1.8453e-252	1151.78	19	31	<-----	0.11892
713.5	arthropathy w/neurological disorder	diseases of the musculoskeletal system and connective tissue	790.99	abnrm blood exm findings nec	symptoms, signs, and ill-defined conditions	13	375	13070	1606822	4.26191	1.071e-07	28.2413	5	8	<-----	0.58105
713.5	arthropathy w/neurological disorder	diseases of the musculoskeletal system and connective tissue	791.0	proteinuria	symptoms, signs, and ill-defined conditions	34	354	10613	1609279	14.5636	2.9243e-84	378.296	11	23	<-----	0.057613
713.5	arthropathy w/neurological disorder	diseases of the musculoskeletal system and connective tissue	792.1	abnormal findings, stool contents	symptoms, signs, and ill-defined conditions	16	372	5248	1614644	13.2331	5.5498e-37	161.416	4	12	<-----	0.076813
713.5	arthropathy w/neurological disorder	diseases of the musculoskeletal system and connective tissue	792.9	abnormal finding, body substanc nec	symptoms, signs, and ill-defined conditions	55	333	42223	1577669	6.17142	2.3472e-45	199.768	3	52	<-----	1.5419e-12
713.5	arthropathy w/neurological disorder	diseases of the musculoskeletal system and connective tissue	793.0	abfnd, rdlog, skull & head	symptoms, signs, and ill-defined conditions	25	363	15859	1604033	6.9658	1.4749e-26	113.754	12	13	<-----	1
713.5	arthropathy w/neurological disorder	diseases of the musculoskeletal system and connective tissue	793.1	abfnd, rdlog, lung field	symptoms, signs, and ill-defined conditions	31	357	13746	1606146	10.1462	3.9252e-51	226.247	16	15	----->	1
713.5	arthropathy w/neurological disorder	diseases of the musculoskeletal system and connective tissue	793.6	abfnd, rdlog, abdominal area	symptoms, signs, and ill-defined conditions	12	376	5401	1614491	9.54014	2.7469e-19	80.612	7	5	----->	0.77441
713.5	arthropathy w/neurological disorder	diseases of the musculoskeletal system and connective tissue	793.7	abfnd, rdlog, musculoskel systm	symptoms, signs, and ill-defined conditions	11	377	2376	1617516	19.8634	1.8595e-39	172.746	9	2	----->	0.06543
713.5	arthropathy w/neurological disorder	diseases of the musculoskeletal system and connective tissue	793.8	abfnd, rdlog, breast	symptoms, signs, and ill-defined conditions	15	373	14144	1605748	4.56549	1.3566e-09	36.7303	1	14	<-----	0.00097656
713.5	arthropathy w/neurological disorder	diseases of the musculoskeletal system and connective tissue	793.80	abfnd, rdlog, breast, mammogrm nos	symptoms, signs, and ill-defined conditions	20	368	22253	1597639	3.90187	6.5158e-10	38.1605	10	10	------	1
713.5	arthropathy w/neurological disorder	diseases of the musculoskeletal system and connective tissue	793.81	abfnd, breast, mammogrphc microcalc	symptoms, signs, and ill-defined conditions	11	377	5996	1613896	7.85354	3.7248e-14	57.3088	8	3	----->	0.22656
713.5	arthropathy w/neurological disorder	diseases of the musculoskeletal system and connective tissue	794.30	abrslt, fnctn study, cv nos	symptoms, signs, and ill-defined conditions	24	364	4273	1615619	24.9296	4.8574e-109	492.148	8	16	<-----	0.15159
713.5	arthropathy w/neurological disorder	diseases of the musculoskeletal system and connective tissue	794.31	abrslt, fnctn study, ekg	symptoms, signs, and ill-defined conditions	170	218	70381	1549511	17.1685	1.95229999934851e-315	1441.56	70	100	<-----	0.025844
713.5	arthropathy w/neurological disorder	diseases of the musculoskeletal system and connective tissue	794.4	abrslt, fnctn study, kidney	symptoms, signs, and ill-defined conditions	49	339	5669	1614223	41.1579	0	1628.4	25	24	----->	1
713.5	arthropathy w/neurological disorder	diseases of the musculoskeletal system and connective tissue	794.8	abrslt, fnctn study, liver	symptoms, signs, and ill-defined conditions	37	351	18584	1601308	9.08302	1.3455e-52	232.964	14	23	<-----	0.18774
713.5	arthropathy w/neurological disorder	diseases of the musculoskeletal system and connective tissue	795.79	abfnd, immunological nos	symptoms, signs, and ill-defined conditions	112	276	47521	1572371	13.427	7.4127e-199	905.161	26	86	<-----	1.1009e-08
713.5	arthropathy w/neurological disorder	diseases of the musculoskeletal system and connective tissue	796.4	abfnd, clinical nec	symptoms, signs, and ill-defined conditions	40	348	30769	1589123	5.93642	7.1695e-33	142.606	13	27	<-----	0.038477
713.5	arthropathy w/neurological disorder	diseases of the musculoskeletal system and connective tissue	799.0	asphyxia and hypoxemia	symptoms, signs, and ill-defined conditions	21	367	10354	1609538	8.89501	1.9149e-30	131.51	7	14	<-----	0.18925
713.5	arthropathy w/neurological disorder	diseases of the musculoskeletal system and connective tissue	799.02	hypoxemia	symptoms, signs, and ill-defined conditions	18	370	6366	1613526	12.3305	2.5281e-38	167.557	12	6	----->	0.23788
713.5	arthropathy w/neurological disorder	diseases of the musculoskeletal system and connective tissue	799.3	debility nos	symptoms, signs, and ill-defined conditions	32	356	5606	1614286	25.8838	5.4541e-149	675.807	17	14	----->	0.7201
713.5	arthropathy w/neurological disorder	diseases of the musculoskeletal system and connective tissue	805.00	fx, closed cervical vertebra nos	injury and poisoning	12	376	4807	1615085	10.723	5.0829e-22	93.0563	1	11	<-----	0.0063477
713.5	arthropathy w/neurological disorder	diseases of the musculoskeletal system and connective tissue	820.8	fx neck of femur nos, closed	injury and poisoning	15	373	5866	1614026	11.065	2.1133e-28	122.175	7	8	<-----	1
713.5	arthropathy w/neurological disorder	diseases of the musculoskeletal system and connective tissue	821.00	fx femur nos, closed	injury and poisoning	14	374	5558	1614334	10.8725	5.0036e-26	111.332	5	9	<-----	0.42395
713.5	arthropathy w/neurological disorder	diseases of the musculoskeletal system and connective tissue	823.80	fx tibia nos, closed	injury and poisoning	30	358	6272	1613620	21.5592	2.1773e-115	521.327	13	17	<-----	0.58466
713.5	arthropathy w/neurological disorder	diseases of the musculoskeletal system and connective tissue	823.81	fx fibula nos, closed	injury and poisoning	12	376	2744	1617148	18.8087	1.0858e-40	178.395	4	8	<-----	0.3877
713.5	arthropathy w/neurological disorder	diseases of the musculoskeletal system and connective tissue	823.82	fx tibia w/fibula nos, closed	injury and poisoning	11	377	3023	1616869	15.6059	1.6951e-30	131.752	4	7	<-----	0.54883
713.5	arthropathy w/neurological disorder	diseases of the musculoskeletal system and connective tissue	824.8	fx ankle nos, closed	injury and poisoning	69	319	9793	1610099	35.5627	0	1864.04	19	47	<-----	0.00075611
713.5	arthropathy w/neurological disorder	diseases of the musculoskeletal system and connective tissue	825.0	fx calcaneus, closed	injury and poisoning	13	375	1266	1618626	44.3226	1.0744e-107	485.968	1	10	<-----	0.011719
713.5	arthropathy w/neurological disorder	diseases of the musculoskeletal system and connective tissue	825.20	fx foot bone nos, closed	injury and poisoning	45	343	4278	1615614	49.5468	0	1830.26	11	29	<-----	0.0064266
713.5	arthropathy w/neurological disorder	diseases of the musculoskeletal system and connective tissue	825.25	fx metatarsal, closed	injury and poisoning	28	360	4410	1615482	28.4917	1.8e-145	659.628	11	15	<-----	0.5572
713.5	arthropathy w/neurological disorder	diseases of the musculoskeletal system and connective tissue	825.30	fx foot bone nos, open	injury and poisoning	24	364	1754	1618138	60.8269	2.8078e-274	1252.17	5	19	<-----	0.0066108
713.5	arthropathy w/neurological disorder	diseases of the musculoskeletal system and connective tissue	826.0	fx phalanx, foot, closed	injury and poisoning	10	378	3874	1616018	11.0356	5.6893e-19	79.1733	4	6	<-----	0.75391
713.5	arthropathy w/neurological disorder	diseases of the musculoskeletal system and connective tissue	829.0	fracture nos, closed	injury and poisoning	18	370	6802	1613090	11.537	1.5154e-35	154.843	5	12	<-----	0.14346
713.5	arthropathy w/neurological disorder	diseases of the musculoskeletal system and connective tissue	836.0	tear medial meniscus knee, current	injury and poisoning	19	369	10445	1609447	7.93406	3.7464e-24	102.779	9	10	<-----	1
713.5	arthropathy w/neurological disorder	diseases of the musculoskeletal system and connective tissue	836.2	tear meniscus nec, current	injury and poisoning	12	376	11874	1608018	4.32202	2.6201e-07	26.5112	4	8	<-----	0.3877
713.5	arthropathy w/neurological disorder	diseases of the musculoskeletal system and connective tissue	844.9	sprain/strain, knee/leg nos	injury and poisoning	14	374	10267	1609625	5.86864	1.6878e-12	49.817	3	11	<-----	0.057373
713.5	arthropathy w/neurological disorder	diseases of the musculoskeletal system and connective tissue	845.00	sprain/strain, ankle nos	injury and poisoning	26	362	24203	1595689	4.73526	1.7139e-16	67.907	8	18	<-----	0.075519
713.5	arthropathy w/neurological disorder	diseases of the musculoskeletal system and connective tissue	847.0	sprain/strain, neck	injury and poisoning	21	367	16059	1603833	5.71471	1.4876e-17	72.7286	2	19	<-----	0.00022125
713.5	arthropathy w/neurological disorder	diseases of the musculoskeletal system and connective tissue	860.0	pneumothorax, traum w/o opn wnd	injury and poisoning	27	361	17981	1601911	6.66317	6.2035e-27	115.472	4	23	<-----	0.00031075
713.5	arthropathy w/neurological disorder	diseases of the musculoskeletal system and connective tissue	871.5	penetrate, eyeball w/magnetic fb	injury and poisoning	25	363	14879	1605013	7.42913	8.7557e-29	123.923	7	16	<-----	0.09314
713.5	arthropathy w/neurological disorder	diseases of the musculoskeletal system and connective tissue	879.2	wound, open, antr abdomen w/o cmpl	injury and poisoning	10	378	2558	1617334	16.7266	8.2523e-30	128.61	4	6	<-----	0.75391
713.5	arthropathy w/neurological disorder	diseases of the musculoskeletal system and connective tissue	891.0	wnd opn knee/leg/ankle w/o cmpl	injury and poisoning	31	357	6766	1613126	20.7028	6.8559e-114	514.441	13	18	<-----	0.47313
713.5	arthropathy w/neurological disorder	diseases of the musculoskeletal system and connective tissue	891.1	wnd opn knee/leg/ankle w/cmpl	injury and poisoning	22	366	2710	1617182	35.87	9.49e-147	665.504	10	12	<-----	0.83181
713.5	arthropathy w/neurological disorder	diseases of the musculoskeletal system and connective tissue	892.0	wound, open, foot w/o cmpl	injury and poisoning	45	343	3884	1616008	54.5862	0	2022.06	25	20	----->	0.55148
713.5	arthropathy w/neurological disorder	diseases of the musculoskeletal system and connective tissue	892.1	wound, open, foot w/cmpl	injury and poisoning	19	369	1195	1618697	69.7469	2.8441e-250	1141.71	9	9	------	1
713.5	arthropathy w/neurological disorder	diseases of the musculoskeletal system and connective tissue	893.0	wound, open, toe(s) w/o cmpl	injury and poisoning	20	368	1635	1618257	53.7913	1.5995e-202	922.025	9	11	<-----	0.8238
713.5	arthropathy w/neurological disorder	diseases of the musculoskeletal system and connective tissue	895.0	amput, traum, toe(s) w/o cmpl	injury and poisoning	31	357	562	1619330	250.203	0	6494.01	14	17	<-----	0.7201
713.5	arthropathy w/neurological disorder	diseases of the musculoskeletal system and connective tissue	897.0	amput traum leg blw knee unilt -cmp	injury and poisoning	28	360	1064	1618828	118.335	0	2839.87	17	10	----->	0.24779
713.5	arthropathy w/neurological disorder	diseases of the musculoskeletal system and connective tissue	897.4	amput traum leg nos unilt w/o cmpl	injury and poisoning	13	375	813	1619079	69.0382	1.533e-168	765.719	5	8	<-----	0.58105
713.5	arthropathy w/neurological disorder	diseases of the musculoskeletal system and connective tissue	924.3	contusion, toe	injury and poisoning	14	374	1673	1618219	36.2074	1.9057e-94	425.088	9	5	----->	0.42395
713.5	arthropathy w/neurological disorder	diseases of the musculoskeletal system and connective tissue	940.0	burn, chemical, eyelid/periocular	injury and poisoning	11	377	166	1619726	284.698	0	2581.08	2	8	<-----	0.10937
713.5	arthropathy w/neurological disorder	diseases of the musculoskeletal system and connective tissue	958.3	infection, posttraumatic wound nec	injury and poisoning	12	376	1899	1617993	27.1922	5.5606e-60	266.833	6	6	------	1
713.5	arthropathy w/neurological disorder	diseases of the musculoskeletal system and connective tissue	959.1	injury nos, trunk	injury and poisoning	17	371	11324	1608568	6.509	4.6647e-17	70.4736	1	16	<-----	0.00027466
713.5	arthropathy w/neurological disorder	diseases of the musculoskeletal system and connective tissue	959.2	injury nos, shoulder/upper arm	injury and poisoning	18	370	12515	1607377	6.24824	4.3614e-17	70.6062	6	12	<-----	0.23788
713.5	arthropathy w/neurological disorder	diseases of the musculoskeletal system and connective tissue	959.3	injury nos, elbow/forearm/wrist	injury and poisoning	24	364	23222	1596670	4.53341	1.9035e-14	58.6294	6	18	<-----	0.022656
713.5	arthropathy w/neurological disorder	diseases of the musculoskeletal system and connective tissue	959.4	injury nos, hand	injury and poisoning	19	369	17064	1602828	4.83652	7.8965e-13	51.3077	6	13	<-----	0.16707
713.5	arthropathy w/neurological disorder	diseases of the musculoskeletal system and connective tissue	959.5	injury nos, finger	injury and poisoning	13	375	16369	1603523	3.39598	1.3425e-05	18.9491	2	11	<-----	0.022461
713.5	arthropathy w/neurological disorder	diseases of the musculoskeletal system and connective tissue	959.6	injury nos, hip/thigh	injury and poisoning	13	375	6824	1613068	8.19456	1.7606e-17	72.3961	2	11	<-----	0.022461
713.5	arthropathy w/neurological disorder	diseases of the musculoskeletal system and connective tissue	959.7	injury nos, lower leg	injury and poisoning	123	265	50906	1568986	14.3057	1.5699e-225	1027.87	32	88	<-----	3.1811e-07
713.5	arthropathy w/neurological disorder	diseases of the musculoskeletal system and connective tissue	959.8	inj nos oth spec sites, incl mlt	injury and poisoning	22	366	22320	1597572	4.30237	2.0417e-12	49.4435	6	16	<-----	0.052479
713.5	arthropathy w/neurological disorder	diseases of the musculoskeletal system and connective tissue	959.9	injury nos, site nos	injury and poisoning	12	376	14014	1605878	3.65716	8.1141e-06	19.9108	2	9	<-----	0.06543
713.5	arthropathy w/neurological disorder	diseases of the musculoskeletal system and connective tissue	995.2	advef, drug/med/biol substance, nos	injury and poisoning	16	372	10026	1609866	6.9062	2.412e-17	71.7749	3	13	<-----	0.021271
713.5	arthropathy w/neurological disorder	diseases of the musculoskeletal system and connective tissue	995.3	advef, allergy, unspecified	injury and poisoning	11	377	28366	1591526	1.63707	0.15158	2.05626	3	8	<-----	0.22656
713.5	arthropathy w/neurological disorder	diseases of the musculoskeletal system and connective tissue	995.91	advef sirs d/t sepsis	injury and poisoning	13	375	1929	1617963	29.0769	8.3965e-70	311.906	8	4	----->	0.3877
713.5	arthropathy w/neurological disorder	diseases of the musculoskeletal system and connective tissue	996.1	malfunction, vascular device/graft	injury and poisoning	17	371	3781	1616111	19.5857	3.181e-60	267.946	8	9	<-----	1
713.5	arthropathy w/neurological disorder	diseases of the musculoskeletal system and connective tissue	996.4	mech cmpl intrn orth dev/graft	injury and poisoning	26	362	3713	1616179	31.2629	1.9447e-149	677.867	16	10	----->	0.32694
713.5	arthropathy w/neurological disorder	diseases of the musculoskeletal system and connective tissue	996.59	malfunction other device/graft	injury and poisoning	12	376	4992	1614900	10.3244	4.237e-21	88.8603	3	9	<-----	0.146
713.5	arthropathy w/neurological disorder	diseases of the musculoskeletal system and connective tissue	996.62	infct d/t oth vascular dev/graft	injury and poisoning	21	367	4033	1615859	22.926	1.1455e-87	393.945	6	14	<-----	0.11532
713.5	arthropathy w/neurological disorder	diseases of the musculoskeletal system and connective tissue	996.67	infct d/t internal orth device nec	injury and poisoning	15	373	1415	1618477	45.9973	1.8711e-129	585.986	10	4	----->	0.17957
713.5	arthropathy w/neurological disorder	diseases of the musculoskeletal system and connective tissue	996.73	complication, renal dialys dev/grft	injury and poisoning	21	367	1483	1618409	62.4454	3.4225e-247	1127.54	10	11	<-----	1
713.5	arthropathy w/neurological disorder	diseases of the musculoskeletal system and connective tissue	996.74	complication, oth vascular dev/grft	injury and poisoning	20	368	3640	1616252	24.1318	2.8447e-88	396.724	7	13	<-----	0.26318
713.5	arthropathy w/neurological disorder	diseases of the musculoskeletal system and connective tissue	996.78	complication, oth int orth device	injury and poisoning	14	374	2870	1617022	21.0907	1.0385e-53	238.066	8	6	----->	0.79053
713.5	arthropathy w/neurological disorder	diseases of the musculoskeletal system and connective tissue	996.81	complication, kidney transplant	injury and poisoning	44	344	4769	1615123	43.3184	0	1560.96	10	34	<-----	0.00038813
713.5	arthropathy w/neurological disorder	diseases of the musculoskeletal system and connective tissue	996.86	complication, pancreas transplant	injury and poisoning	18	370	327	1619565	240.947	0	3673.68	2	16	<-----	0.0013123
713.5	arthropathy w/neurological disorder	diseases of the musculoskeletal system and connective tissue	997.4	complications, digestive system	injury and poisoning	10	378	3356	1616536	12.743	3.1694e-22	93.9911	4	6	<-----	0.75391
713.5	arthropathy w/neurological disorder	diseases of the musculoskeletal system and connective tissue	997.62	infection of amputated stump	injury and poisoning	13	375	536	1619356	104.734	3.4587e-255	1164.32	8	5	----->	0.58105
713.5	arthropathy w/neurological disorder	diseases of the musculoskeletal system and connective tissue	997.69	cmpl nec, late amputation stump	injury and poisoning	15	373	744	1619148	87.5177	1.849e-247	1128.77	5	10	<-----	0.30176
713.5	arthropathy w/neurological disorder	diseases of the musculoskeletal system and connective tissue	998.3	disruption of wound	injury and poisoning	11	377	2071	1617821	22.793	1.3028e-45	200.939	3	8	<-----	0.22656
713.5	arthropathy w/neurological disorder	diseases of the musculoskeletal system and connective tissue	998.32	disrupt, external oper surg wound	injury and poisoning	13	375	1192	1618700	47.0763	1.6464e-114	517.288	10	3	----->	0.092285
713.5	arthropathy w/neurological disorder	diseases of the musculoskeletal system and connective tissue	998.59	infection nec postoperative	injury and poisoning	44	344	8440	1611452	24.4213	4.2116e-187	851.091	24	20	----->	0.65159
713.5	arthropathy w/neurological disorder	diseases of the musculoskeletal system and connective tissue	998.83	non-healing surgical wound	injury and poisoning	10	378	888	1619004	48.2329	2.9818e-89	401.224	4	6	<-----	0.75391
713.5	arthropathy w/neurological disorder	diseases of the musculoskeletal system and connective tissue	999.9	complication of med care nec/nos	injury and poisoning	17	371	5527	1614365	13.384	9.726e-40	174.035	10	7	----->	0.62906
713.5	arthropathy w/neurological disorder	diseases of the musculoskeletal system and connective tissue	E885.9	fall same lvl, slip/trip/stmble nec	external causes of injury and supplemental classification	18	370	8707	1611185	9.00218	1.1144e-26	114.31	9	9	------	1
713.5	arthropathy w/neurological disorder	diseases of the musculoskeletal system and connective tissue	E888.8	fall, accidental nec	external causes of injury and supplemental classification	14	374	4061	1615831	14.8943	6.2309e-37	161.186	9	5	----->	0.42395
713.5	arthropathy w/neurological disorder	diseases of the musculoskeletal system and connective tissue	E888.9	fall, accidental nos	external causes of injury and supplemental classification	29	359	9637	1610255	13.4976	8.6387e-67	298.078	17	12	----->	0.45826
713.5	arthropathy w/neurological disorder	diseases of the musculoskeletal system and connective tissue	E917.9	accident by striking nec, ww/o fall	external causes of injury and supplemental classification	13	375	12732	1607160	4.37597	5.6287e-08	29.4872	3	10	<-----	0.092285
713.5	arthropathy w/neurological disorder	diseases of the musculoskeletal system and connective tissue	E927	accid d/t overexertion/repetitive	external causes of injury and supplemental classification	13	375	16088	1603804	3.4559	9.647e-06	19.5801	4	9	<-----	0.26685
713.5	arthropathy w/neurological disorder	diseases of the musculoskeletal system and connective tissue	E933.1	adverse effect, immunosuppressives	external causes of injury and supplemental classification	16	372	3675	1616217	18.9156	1.2323e-54	242.311	6	10	<-----	0.4545
713.5	arthropathy w/neurological disorder	diseases of the musculoskeletal system and connective tissue	V03.82	vaccine for streptococcus pneumonia	external causes of injury and supplemental classification	44	344	26479	1593413	7.69699	5.6121e-50	220.95	25	19	----->	0.45138
713.5	arthropathy w/neurological disorder	diseases of the musculoskeletal system and connective tissue	V04.8	vaccine for viral disease nec	external causes of injury and supplemental classification	82	306	55724	1564168	7.522	2.9851e-80	359.883	11	71	<-----	6.8138e-12
713.5	arthropathy w/neurological disorder	diseases of the musculoskeletal system and connective tissue	V04.81	vaccine for influenza	external causes of injury and supplemental classification	99	289	88156	1531736	5.95209	4.0179e-67	299.604	53	46	----->	0.54671
713.5	arthropathy w/neurological disorder	diseases of the musculoskeletal system and connective tissue	V05.3	vaccine for viral hepatitis	external causes of injury and supplemental classification	13	375	58106	1561786	0.931778	0.90926	0.0129905	2	11	<-----	0.022461
713.5	arthropathy w/neurological disorder	diseases of the musculoskeletal system and connective tissue	V05.8	vaccine for diseases nec	external causes of injury and supplemental classification	15	373	23775	1596117	2.69977	0.00020235	13.8091	1	14	<-----	0.00097656
713.5	arthropathy w/neurological disorder	diseases of the musculoskeletal system and connective tissue	V05.9	vaccine for disease nos	external causes of injury and supplemental classification	11	377	8792	1611100	5.3467	6.7724e-09	33.5991	2	9	<-----	0.06543
713.5	arthropathy w/neurological disorder	diseases of the musculoskeletal system and connective tissue	V06.5	vaccine, tetanus-diphth [td][dt]	external causes of injury and supplemental classification	28	360	63714	1556178	1.89968	0.0013946	10.2129	11	17	<-----	0.34493
713.5	arthropathy w/neurological disorder	diseases of the musculoskeletal system and connective tissue	V07.2	prophylactic immunotherapy	external causes of injury and supplemental classification	24	364	2584	1617308	41.2677	1.4297e-184	839.45	9	15	<-----	0.30746
713.5	arthropathy w/neurological disorder	diseases of the musculoskeletal system and connective tissue	V07.8	prophylactic/treatment measures nec	external causes of injury and supplemental classification	44	344	135527	1484365	1.40091	0.043016	4.09477	20	24	<-----	0.65159
713.5	arthropathy w/neurological disorder	diseases of the musculoskeletal system and connective tissue	V12.72	hx, prsnl, colonic polyps	external causes of injury and supplemental classification	22	366	7837	1612055	12.3644	1.2844e-46	205.55	13	9	----->	0.52347
713.5	arthropathy w/neurological disorder	diseases of the musculoskeletal system and connective tissue	V16.3	hx, family, breast malignancy	external causes of injury and supplemental classification	18	370	11320	1608572	6.91297	2.1469e-19	81.0989	2	16	<-----	0.0013123
713.5	arthropathy w/neurological disorder	diseases of the musculoskeletal system and connective tissue	V25.09	contraceptive management nec	external causes of injury and supplemental classification	13	375	30327	1589565	1.81703	0.049912	3.84441	6	7	<-----	1
713.5	arthropathy w/neurological disorder	diseases of the musculoskeletal system and connective tissue	V42.0	transplant, kidney	external causes of injury and supplemental classification	50	338	5667	1614225	42.1371	0	1698.55	11	39	<-----	9.0215e-05
713.5	arthropathy w/neurological disorder	diseases of the musculoskeletal system and connective tissue	V42.1	transplant, heart	external causes of injury and supplemental classification	14	374	2898	1616994	20.8865	3.7025e-53	235.534	3	11	<-----	0.057373
713.5	arthropathy w/neurological disorder	diseases of the musculoskeletal system and connective tissue	V42.83	transplant, pancreas	external causes of injury and supplemental classification	15	373	266	1619626	244.859	0	3096.9	2	13	<-----	0.0073853
713.5	arthropathy w/neurological disorder	diseases of the musculoskeletal system and connective tissue	V43.1	lens replacement nec	external causes of injury and supplemental classification	37	351	13205	1606687	12.8259	8.1878e-79	353.279	18	19	<-----	1
713.5	arthropathy w/neurological disorder	diseases of the musculoskeletal system and connective tissue	V43.64	hip joint replacement status	external causes of injury and supplemental classification	13	375	3809	1616083	14.7084	7.775e-34	147.018	2	11	<-----	0.022461
713.5	arthropathy w/neurological disorder	diseases of the musculoskeletal system and connective tissue	V43.65	knee joint replacement status	external causes of injury and supplemental classification	14	374	2794	1617098	21.6654	2.9002e-55	245.193	4	10	<-----	0.17957
713.5	arthropathy w/neurological disorder	diseases of the musculoskeletal system and connective tissue	V45.01	cardiac pacemaker in situ	external causes of injury and supplemental classification	10	378	3939	1615953	10.853	1.2677e-18	77.5906	5	5	------	1
713.5	arthropathy w/neurological disorder	diseases of the musculoskeletal system and connective tissue	V45.1	renal dialysis status	external causes of injury and supplemental classification	12	376	809	1619083	63.8725	1.8605e-143	650.365	6	6	------	1
713.5	arthropathy w/neurological disorder	diseases of the musculoskeletal system and connective tissue	V45.4	arthrodesis status	external causes of injury and supplemental classification	34	354	6840	1613052	22.65	1.121e-136	619.191	18	13	----->	0.47313
713.5	arthropathy w/neurological disorder	diseases of the musculoskeletal system and connective tissue	V45.61	pstprcd state, cataract extraction	external causes of injury and supplemental classification	46	342	13026	1606866	16.5921	8.8097e-128	578.295	23	23	------	1
713.5	arthropathy w/neurological disorder	diseases of the musculoskeletal system and connective tissue	V45.69	pstprcd state nec, eye/adnexa	external causes of injury and supplemental classification	44	344	21901	1597991	9.33264	2.4576e-63	282.226	16	28	<-----	0.096142
713.5	arthropathy w/neurological disorder	diseases of the musculoskeletal system and connective tissue	V45.81	pstprc stat, aortocoronary bypass	external causes of injury and supplemental classification	19	369	4787	1615105	17.3726	5.2072e-59	262.376	5	14	<-----	0.063568
713.5	arthropathy w/neurological disorder	diseases of the musculoskeletal system and connective tissue	V45.89	postprocedural status nec	external causes of injury and supplemental classification	27	361	13437	1606455	8.94176	9.6016e-39	169.482	14	13	----->	1
713.5	arthropathy w/neurological disorder	diseases of the musculoskeletal system and connective tissue	V49.71	great toe amputation status	external causes of injury and supplemental classification	18	370	149	1619743	528.848	0	7625.7	8	10	<-----	0.81453
713.5	arthropathy w/neurological disorder	diseases of the musculoskeletal system and connective tissue	V49.72	other toe(s) amputation status	external causes of injury and supplemental classification	24	364	302	1619590	353.597	0	7030.36	8	16	<-----	0.15159
713.5	arthropathy w/neurological disorder	diseases of the musculoskeletal system and connective tissue	V49.73	foot amputation status	external causes of injury and supplemental classification	10	378	196	1619696	218.618	0	1811.24	4	6	<-----	0.75391
713.5	arthropathy w/neurological disorder	diseases of the musculoskeletal system and connective tissue	V49.75	below knee amputation status	external causes of injury and supplemental classification	39	349	1023	1618869	176.838	0	5756.88	27	10	----->	0.0076321
713.5	arthropathy w/neurological disorder	diseases of the musculoskeletal system and connective tissue	V54.0	aftrcr, internal fixation device	external causes of injury and supplemental classification	14	374	2249	1617643	26.9246	1.8223e-69	310.361	10	4	----->	0.17957
713.5	arthropathy w/neurological disorder	diseases of the musculoskeletal system and connective tissue	V54.01	aftrcr, rmv intrn fixation device	external causes of injury and supplemental classification	13	375	1071	1618821	52.3988	1.1758e-127	577.719	12	1	----->	0.003418
713.5	arthropathy w/neurological disorder	diseases of the musculoskeletal system and connective tissue	V54.89	aftercare, orthopedic nec	external causes of injury and supplemental classification	10	378	870	1619022	49.2313	4.0387e-91	409.807	7	3	----->	0.34375
713.5	arthropathy w/neurological disorder	diseases of the musculoskeletal system and connective tissue	V57.89	rehabilitation procedures nec	external causes of injury and supplemental classification	37	351	5321	1614571	31.9859	5.7648e-213	970.067	24	12	----->	0.065245
713.5	arthropathy w/neurological disorder	diseases of the musculoskeletal system and connective tissue	V58.3	attention to dressing/suture	external causes of injury and supplemental classification	17	371	13355	1606537	5.51216	8.4559e-14	55.6967	9	8	----->	1
713.5	arthropathy w/neurological disorder	diseases of the musculoskeletal system and connective tissue	V58.49	aftercare following surgery nec	external causes of injury and supplemental classification	26	362	10309	1609583	11.214	8.0691e-49	215.643	12	14	<-----	0.84502
713.5	arthropathy w/neurological disorder	diseases of the musculoskeletal system and connective tissue	V58.69	aftrcr, long-term use, meds nec	external causes of injury and supplemental classification	11	377	14553	1605339	3.21859	0.00016167	14.2312	5	6	<-----	1
713.5	arthropathy w/neurological disorder	diseases of the musculoskeletal system and connective tissue	V58.81	encounter to fit/adj vasc catheter	external causes of injury and supplemental classification	75	313	18989	1600903	20.2013	8.2599e-238	1084.37	38	36	----->	0.90756
713.5	arthropathy w/neurological disorder	diseases of the musculoskeletal system and connective tissue	V58.82	encounter to fit/adj non-vasc cath	external causes of injury and supplemental classification	66	322	15098	1604794	21.7865	1.8723e-233	1064.33	34	30	----->	0.70798
713.5	arthropathy w/neurological disorder	diseases of the musculoskeletal system and connective tissue	V58.83	encntr, therapeutic drug monitoring	external causes of injury and supplemental classification	14	374	7974	1611918	7.56699	4.4774e-17	70.5544	7	7	------	1
713.5	arthropathy w/neurological disorder	diseases of the musculoskeletal system and connective tissue	V58.89	aftercare nec	external causes of injury and supplemental classification	38	350	7282	1612610	24.0433	2.579e-161	732.487	21	17	----->	0.6271
713.5	arthropathy w/neurological disorder	diseases of the musculoskeletal system and connective tissue	V59.4	donor, kidney	external causes of injury and supplemental classification	24	364	3468	1616424	30.7317	6.3463e-136	615.73	6	18	<-----	0.022656
713.5	arthropathy w/neurological disorder	diseases of the musculoskeletal system and connective tissue	V65.49	counseling nec	external causes of injury and supplemental classification	10	378	11819	1608073	3.59943	6.9932e-05	15.8127	5	5	------	1
713.5	arthropathy w/neurological disorder	diseases of the musculoskeletal system and connective tissue	V67.0	follow-up exam, after surgery	external causes of injury and supplemental classification	58	330	46225	1573667	5.98343	1.9267e-45	200.161	5	53	<-----	3.4965e-11
713.5	arthropathy w/neurological disorder	diseases of the musculoskeletal system and connective tissue	V67.00	follow-up exam, after surgery nos	external causes of injury and supplemental classification	65	323	19580	1600312	16.4476	2.2296e-169	769.57	39	19	----->	0.011928
713.5	arthropathy w/neurological disorder	diseases of the musculoskeletal system and connective tissue	V67.4	follow-up exam, following healed fx	external causes of injury and supplemental classification	56	332	23037	1596855	11.692	1.1969e-101	458.18	12	42	<-----	5.2094e-05
713.5	arthropathy w/neurological disorder	diseases of the musculoskeletal system and connective tissue	V67.59	follow-up exam nec	external causes of injury and supplemental classification	28	360	9023	1610869	13.8856	9.819e-67	297.823	5	23	<-----	0.00091223
713.5	arthropathy w/neurological disorder	diseases of the musculoskeletal system and connective tissue	V67.9	follow-up exam nos	external causes of injury and supplemental classification	69	319	55712	1564180	6.0729	3.2235e-53	235.81	9	60	<-----	2.2444e-10
713.5	arthropathy w/neurological disorder	diseases of the musculoskeletal system and connective tissue	V68.9	administrative encounter nos	external causes of injury and supplemental classification	11	377	2278	1617614	20.7192	2.9556e-41	180.984	6	4	----->	0.75391
713.5	arthropathy w/neurological disorder	diseases of the musculoskeletal system and connective tissue	V70.0	routine medical examination	external causes of injury and supplemental classification	83	305	149297	1470595	2.68053	2.3818e-16	67.2582	23	60	<-----	5.9736e-05
713.5	arthropathy w/neurological disorder	diseases of the musculoskeletal system and connective tissue	V71.4	observation, accident nec	external causes of injury and supplemental classification	16	372	14220	1605672	4.85662	4.7579e-11	43.2743	6	10	<-----	0.4545
713.5	arthropathy w/neurological disorder	diseases of the musculoskeletal system and connective tissue	V72.0	examination of eyes/vision	external causes of injury and supplemental classification	23	365	31020	1588872	3.22762	2.4012e-08	31.1396	8	15	<-----	0.21004
713.5	arthropathy w/neurological disorder	diseases of the musculoskeletal system and connective tissue	V72.3	gynecological examination	external causes of injury and supplemental classification	48	340	87372	1532520	2.47626	2.3683e-09	35.6444	6	42	<-----	1.0087e-07
713.5	arthropathy w/neurological disorder	diseases of the musculoskeletal system and connective tissue	V72.31	gynecological examination, routine	external causes of injury and supplemental classification	27	361	55185	1564707	2.12065	0.00020225	13.81	15	12	----->	0.70111
713.5	arthropathy w/neurological disorder	diseases of the musculoskeletal system and connective tissue	V72.81	preoperative cardiovascular exam	external causes of injury and supplemental classification	133	255	49664	1570228	16.4904	1.4042e-275	1258.15	64	67	<-----	0.86137
713.5	arthropathy w/neurological disorder	diseases of the musculoskeletal system and connective tissue	V72.83	preoperative examination nec	external causes of injury and supplemental classification	37	351	12568	1607324	13.4813	2.0736e-83	374.388	25	12	----->	0.047031
713.5	arthropathy w/neurological disorder	diseases of the musculoskeletal system and connective tissue	V72.84	preoperative examination nos	external causes of injury and supplemental classification	60	328	19757	1600135	14.8154	3.7909e-141	639.748	27	30	<-----	0.79137
713.5	arthropathy w/neurological disorder	diseases of the musculoskeletal system and connective tissue	V74.1	screening, pulmonary tb	external causes of injury and supplemental classification	15	373	21729	1598163	2.95777	4.1196e-05	16.8155	6	9	<-----	0.60724
713.5	arthropathy w/neurological disorder	diseases of the musculoskeletal system and connective tissue	V76.12	scrng mammogram nec	external causes of injury and supplemental classification	57	331	56063	1563829	4.80352	5.9856e-33	142.964	19	38	<-----	0.016348
713.5	arthropathy w/neurological disorder	diseases of the musculoskeletal system and connective tissue	V76.2	screening, mlig neop, cervix	external causes of injury and supplemental classification	34	354	70592	1549300	2.10793	3.7096e-05	17.0145	16	18	<-----	0.86417
713.5	arthropathy w/neurological disorder	diseases of the musculoskeletal system and connective tissue	V76.41	screening, mlig neop, rectum	external causes of injury and supplemental classification	11	377	7074	1612818	6.6523	1.2503e-11	45.8908	2	9	<-----	0.06543
713.5	arthropathy w/neurological disorder	diseases of the musculoskeletal system and connective tissue	V76.51	screening for mlig neop, colon	external causes of injury and supplemental classification	27	361	20528	1599364	5.82716	1.2515e-22	95.8306	10	17	<-----	0.24779
713.5	arthropathy w/neurological disorder	diseases of the musculoskeletal system and connective tissue	V81.0	screening, ischemic heart disease	external causes of injury and supplemental classification	17	371	5438	1614454	13.6038	1.8257e-40	177.362	3	14	<-----	0.012726
713.5	arthropathy w/neurological disorder	diseases of the musculoskeletal system and connective tissue	V82.81	screening for osteoporosis	external causes of injury and supplemental classification	15	373	6866	1613026	9.44757	1.0718e-23	100.697	2	13	<-----	0.0073853
713.5	arthropathy w/neurological disorder	diseases of the musculoskeletal system and connective tissue	V82.9	screen for condition nos	external causes of injury and supplemental classification	18	370	11462	1608430	6.82673	4.2818e-19	79.7348	0	18	<-----	7.6294e-06

## Sheet: How to intepret the columns
Here is a description of each column:
(A) Concept 1: The ICD-9 code for concept 1. Each row is an association of two concepts (two ICD-9 codes)
(B) Concept 1 Description: A text description of the concept 1 code
(C) Concept 1 Category: A text description of the disease category of the concept 1 code
(D) Concept 2: The ICD-9 code for concept 2.
(E) Concept 2 Description: A text description of the concept 2 code
(F) Concept 2 Category: A text description of the disease category of the concept 2 code.
(G) # Pts with C1 and C2: The number of patients who had BOTH concept 1 AND concept 2
(H) # Pts with C1, NOT C2: The number of patients who had only concept 1 but not concept 2
(I) # Pts with C2, NOT C1: The number of patients who had only concept 2 but not concept 1
(J) # Pts without C1 or C2: The number of patients who had neither concept 1 nor concept 2
(The four numbers above can be made into a 2x2 table....)
(K) Odds Ratio: The odds ratio for the relationship of concept 1 and concept 2
(L) Chi Square p value: A chi square p value for the relationship
(M) Chi square statistics: The chi square statistic. This was useful since some of the p values were too small to calculate
(N) # times C1 precedes C2: Among the cases where concept 1 and concept 2 appeared together, how many times did concept 1 appear first
(O) # times C2 precedes C1: Among the cases where concept 1 and concept 2 appeared together, how many times did concept 2 appear first
(P) Temporal Direction: An arrow showing the general direction. <----- means Concept 2 appears before concept 1 more often, -----> means concept 1 appeared before concept 2 more often, and ------ means a tie (both appeared equally before and after).
(Q) Temporal P value: A p value for the strength of the directionality
